# Supplementary material for: Towards a System Level Understanding of Non-Model Organisms Sampled from the Environment: A Network Biology Approach
Source: PLoS Comput Biol. 2011 Aug 25;7(8):e1002126. doi: 10.1371/journal.pcbi.1002126 (PMC3161900; doi:10.1371/journal.pcbi.1002126)
Supplement: Table S1 — Gene expression and metabolic changes. Identifiable transcripts and metabolites that were significantly different between sampling sites (ANOVA FDR<0.05). Best viewed in MS-Excel. (XLSX) [file pcbi.1002126.s004.xlsx]

## Sheet: 1-Way ANOVA genes and met
Table S1
Expression of A) metabolites and B) transcripts that were identifiable and significantly different by ANOVA at FDR<0.05 between flounders from different sampling sites.
Data shown are fold changes versus the values for Alde, the reference site.
Genbank identifiers are representative for one EST per contig, Symbol shows putative human orthologs
Data are highlighted red where fold change versus Alde was >1.5 and blue where fold change versus Alde was <0.666
*(GSI) or *(K) denotes transcripts or metabolites that were significantly differentially expressed within sites by ANOVA at FDR<0.05 when grouped by gonadosomatic index (GSI) or condition factor (K)
~ (Lep) denotes transcripts or metabolites that were significantly differentially expressed within sites by ANOVA at FDR<0.05 comparing Lepeophtheirus infected and uninfected fish from Morecambe Bay
A) Metabolites
Bin ID	Common Name		PubChem CID		Brunsbuttel	Cuxhaven	Helgoland	Mersey	Morecambe	Tyne
3.222	o-Phosphocholine		1014		4.55684	1.93971	1.75807	1.98827	3.44243	2.40222
2.437	Glutamine		738		2.37042	1.82766	0.975315	1.46589	1.00114	1.5537
4.072	Choline		305		2.3935	2.029	1.975	0.848125	0.839094	1.01276
3.427	Taurine (glucose overlap)		na		1.28263	1.5724	1.93748	1.31859	2.17758	0.736338
3.212	Choline		305		2.79301	1.15914	1.17628	0.990661	1.75049	1.12929
3.482	Glucose *(GSI)		5793		0.830886	1.64328	1.58488	1.49308	1.76307	1.18543
3.312	Maltose/taurine		na		0.564601	1.44007	1.74526	1.52842	1.42946	1.31291
3.417	Taurine (glucose overlap)		na		1.2527	1.47298	1.70464	0.879595	1.6369	0.869303
1.332	Lactate/threonine		na		1.44391	1.17324	1.24906	1.89994	1.05715	0.987293
3.302	Maltose/taurine		na		0.46764	1.19704	1.43007	1.73188	1.41388	1.55242
3.562	Glycine		750		1.97182	1.12694	0.948734	0.818934	1.70503	1.21579
1.327	Lactate/threonine		na		2.2189	1.28748	1.32555	1.01342	1.14025	0.697742
2.467	Glutamine		738		0.685506	0.859539	1.03805	2.4202	1.0573	1.15413
3.307	Maltose/taurine		na		0.405441	0.922581	1.13247	1.78731	0.957015	1.71176
1.322	Lactate/threonine		na		1.67265	1.14894	1.34479	1.21225	0.88508	0.593162
1.337	Lactate/threonine		na		1.34528	0.799072	0.750614	1.51839	0.606549	0.910998
3.142	Malonate		867		0.452564	0.661763	0.774007	2.65603	0.899677	0.472787
3.442	Taurine (glucose overlap)		na		0.582924	0.960009	1.10512	1.18599	1.07192	0.871747
3.282	Taurine		1123		0.376063	0.820004	1.22546	0.682675	0.83777	1.23978
3.887	Glucose		5793		1.39988	0.738778	0.852766	0.410761	0.850588	0.85105
4.122	Lactate		612		0.846383	0.731903	0.831336	0.818563	0.565064	0.656133
3.277	Taurine		1123		0.32721	0.585301	0.928875	0.486134	0.547856	0.909389
B)Transcripts
Transcript ID	Common Name	Genbank	Symbol		Brunsbuttel	Cuxhaven	Helgoland	Mersey	Morecambe	Tyne
Contig504	CYP1A Cytochrome P450 1A	AJ132353	CYP1A1		3.33946	2.71418	2.68084	3.43969	2.10087	4.51768
Contig265	DIABLO	AJ580508	DIABLO		3.37479	2.6832	3.94542	2.67489	2.66598	1.58557
PfIL264G11	Lamin B receptor; ichthyosis	DV568349	LBR		2.40785	1.53247	1.95685	2.72892	2.81807	4.35603
PfIL279C03	DIABLO	DV568917	DIABLO		2.87363	2.55108	3.71412	2.18621	2.52394	1.71323
PfIL201C01	Hepcidin precursor	DV565788	HAMP		2.66146	2.05716	2.33647	2.34497	2.76096	1.70541
PfIL223G08	Transthyretin	DV566569	TTR		1.84898	2.24639	2.59703	2.11495	2.86575	2.07697
Contig122	DIABLO	DV566149	DIABLO		2.65037	2.21356	3.15574	1.77858	2.38773	1.52634
PfIL210C09	Fumarylacetoacetate hydrolase	DV566175	FAH		2.14589	1.85908	2.81568	1.13297	3.34887	2.33767
PfIL227E10	DIABLO	DV566712	DIABLO		2.66395	2.25042	2.90165	1.68513	2.32942	1.72539
PfIL265A03	Catalase	DV568358	CAT		2.44124	1.97743	1.76292	2.37803	2.53478	2.04414
PfIL001B04	Reticulon-1	DV565298	RTN1		2.14178	2.03625	2.51562	2.14912	2.77621	1.28733
PfIL318A02	Protein phosphatase 1, regulatory (inhibitor) subunit 3C	DV570352	PPP1R3C		2.62317	2.13815	1.58379	1.40511	2.12681	2.33228
PfIL278C09	Programmed cell death 4	DV568872	PDCD4		1.80155	2.88535	1.49794	2.39016	1.75584	1.87031
PfIL251C08	Transducer of ERBB2, 1	DV567716	TOB1		2.55224	1.86759	2.33869	1.21878	2.44021	1.6963
Contig215	Histidine ammonia lyase	DV570311	HAL		2.08963	1.63656	2.25956	1.32887	2.18887	2.38925
PfH28-1b	60S ribosomal protein L10a	AJ606078	RPL10A		1.153	1.53214	1.88433	3.26791	2.48248	1.45426
PfIL299G04	SH3 domain binding glutamic acid-rich protein like	EC379280	SH3BGRL		2.21751	1.74591	1.82856	1.36912	2.46859	2.01625
PfIL288F06	Prostate stem cell antigen precursor	DV569225	LOC390940		1.34007	1.24123	1.86056	4.34059	1.57998	1.23439
PfIL003E05	Solute carrier family 6, member 8 (SLC6A8)	EC377565	SLC6A8		2.02125	2.07715	1.82728	2.34948	1.37224	1.76078
PfIL226G11	Tryptophan 2,3-dioxygenase	DV566685	TDO2		2.48176	2.13729	1.52926	2.21367	1.32157	1.68204
PfIL007E07	Syndecan 2	EC377592	SDC2		2.00525	2.58372	1.59594	1.4434	1.89621	1.75646
PfIL234F05	Ceruloplasmin	DV566996	CP		2.11591	2.05943	1.50804	1.89499	1.55831	2.09127
PfIL310C04	Histone deacetylase 1	DV570061	HDAC1		1.19547	1.99255	2.14336	1.24228	2.28354	2.23769
Contig189	Major histocompatibility class I receptor	DV567795	MR1		1.43299	2.12189	2.15396	1.82317	2.08425	1.22848
PfIL212C11	Beta-hexosaminidase alpha chain precursor	DV566228	HEXB		1.19784	1.2758	1.18298	2.66932	2.65268	1.86399
PfIL254E03	Aquaporin 1	DV567863	AQP1		2.28756	1.50019	1.86365	1.82528	1.8041	1.52902
PfIL284H08	Major histocompatibility class I receptor	DV569075	MR1		1.09041	1.41584	1.85781	2.96973	2.3691	1.09615
PfIL304H03	Microsomal glutathione S-transferase 1	EC379360	MGST1		1.59285	1.97402	1.88217	1.45358	1.95016	1.86894
PfIL313A09	Lymphocyte antigen 6 complex, locus D	DV570141	LY6D		2.6085	2.23052	1.44802	1.87282	0.983214	1.51567
PfIL240C03	Histone deacetylase 1	DV567224	HDAC1		2.57513	1.4519	1.68592	1.16861	1.47531	2.17594
Contig981	Microsomal glutathione S-transferase 3	AJ605273	MGST3		1.24546	1.17467	1.70759	1.21762	2.68257	2.41069
PfIL239C04	H+ transporting F1 ATP synthase epsilon subunit	DV567188	ATP5E		1.22663	1.45141	1.90414	1.16959	2.48643	2.05441
PfIL207H05	Carboxymethylenebutenolidase-like	DV566083	CMBL		1.13172	1.27365	1.23134	1.20501	3.59851	1.84303
PfIL305D06	Protease, serine, 1 (trypsin 1)	DV569891	PRSS1		1.98084	1.70082	1.5228	2.57839	1.3905	0.953725
PfIL280A01	Collagen, type XII, alpha 1	EC378974	COL12A1		1.95631	1.16203	1.69085	1.96452	1.13157	1.91824
PfIL300E07	Biotinidase precursor	DV569684	BTD		1.80967	1.19478	1.23532	1.51712	1.96472	2.08342
PfIL020E01	Cytochrome P450 2K5 ~ (Lep)	DV565685	CYP2J2		1.10459	1.43863	1.94165	1.48004	1.60432	2.10046
PfIL220C06	DER1-like domain family, 2	DV566445	DERL2		1.27442	1.21248	1.51386	2.02012	2.72963	0.905106
PfIL284F10	Thioredoxin	EC379041	TXN		1.37979	1.32673	1.47569	1.16127	2.72615	1.56358
Contig543	Hemoglobin beta A chain	DV565314	HBE1		2.8369	2.00851	1.0281	0.783231	1.15666	1.81393
Contig876	Thymosin beta-4	DV566015	TMSB4X		1.31513	1.15388	1.58309	1.73025	1.83186	1.88724
PfIL274E11	Ubiquitin-like protein	DV568723	UBC		0.921835	0.901883	1.2535	3.35025	2.08077	0.976828
PfIL217C10	Aldo-keto reductase family 1, member A1 (aldehyde reductase)	EC377982	AKR1A1		2.45581	1.82283	1.02304	1.05882	1.09371	1.91302
Contig323	Aldehyde dehydrogenase 9 family, member A1 like 1	AJ606079	ALDH9A1		1.58195	0.910914	1.54083	1.24546	2.1668	1.90884
PfIL273D09	Cyclin-dependent kinase inhibitor 3 ~ (Lep)	DV568674	CDKN3		1.24118	1.54679	1.31739	1.82235	2.22169	1.19657
PfIL312H02	Integrator complex subunit 3	DV570134	INTS3		2.78798	1.9844	1.2077	0.72573	0.905606	1.73261
Contig279	Transducer of erbB2, 1	DV567725	TOB1		1.6131	1.19824	2.46947	1.03137	1.60635	1.38534
PfBR1C6	IQ motif containing GTPase activating protein 2 (IQGAP2)	AJ580587	IQGAP1		1.34625	1.29193	2.18344	0.955652	1.56775	1.93856
PfIL236H02	ATG16 autophagy related 16-like	DV567086	ATG16L2		1.67073	2.04882	2.04465	0.948764	1.20704	1.32778
PfIL218F05	P18 splicing regulatory protein	EC378008	SFRS12IP1		1.99687	2.01461	1.61164	1.24053	1.10889	1.25922
PfIL226G02	Carboxypeptidase N, polypeptide 1, 50kD precursor	DV566682	CPN1		1.86575	0.940952	1.22572	2.08198	1.37142	1.71681
PfIL201F09	40S ribosomal protein S27-1	DV565803	RPS27		1.83586	1.53589	1.19442	2.33695	1.04692	1.18213
PfSHA1C9	Early growth response 1	AJ508727	EGR1		1.64559	1.06366	2.35377	1.49328	1.27683	1.29267
PfIL249H04	V-ATPase A subunit 1	DV567648	ATP6V1A		0.901428	1.12842	1.58882	1.27773	2.29915	1.92816
PfIL258H08	Proteasome alpha 1 subunit isoform 2	DV568071	PSMA1		0.848253	1.03246	1.41779	1.06235	2.95181	1.79065
PfIL217E04	Hemoglobin alpha-B chain	DV566378	HBZ		2.73368	2.05337	1.01258	0.723332	0.869171	1.66877
PfIL210E01	Hydroxyacid oxidase 1, liver; glycolate oxidase 1b ~ (Lep)	DV566184	HAO1		1.33173	0.889584	1.43602	1.24648	1.91575	2.23219
PfBF1C11	Inter-alpha-trypsin inhibitor heavy chain H3 precursor.	AJ605135	ITIH3		1.94895	1.54951	1.11524	1.51776	1.39835	1.50537
PfIL268B07	60S acidic ribosomal protein P0 (L10E)	DV568482	RPLP0		2.42053	1.71019	0.877906	1.07815	1.53586	1.39238
PfIL254F12	Microsomal glutathione S-transferase 1	DV567874	MGST1		1.85476	1.75425	1.19846	1.03241	0.975992	2.12677
PfIL305E06	Similar to TIM21-like protein	DV569897	C18ORF55		2.8288	1.83018	0.974235	0.784086	0.825477	1.63385
PfIL318D07	Vitamin K-dependent gamma-glutamyl carboxylase	DV570371	GGCX		1.84457	1.22557	1.02508	1.28794	1.51521	1.90017
PfIL234H11	LSM7 homolog	DV567008	LSM7		1.00107	1.38278	1.35659	1.20491	2.37483	1.39132
PfIL258D05	Inter-alpha (globulin) inhibitor H3	DV568043	ITIH3		1.17629	1.92068	1.64733	1.13615	0.838764	1.99091
PfIL215F05	Prostaglandin D synthase homolog	DV566328	PTGDS		1.372	1.24642	1.3844	1.42679	2.3709	0.874729
PfIL238F01	Glutathione S-transferase (theta class)	EC378322	GSTT2		1.04146	0.909088	1.47844	1.38459	2.44982	1.35269
PfIL301H03	Manganese superoxide dismutase	EC379315	SOD2		0.886026	1.53649	1.64129	1.30965	1.66229	1.5468
PfIL227D07	Calmodulin	DV566705	CALM3		1.17675	1.12218	1.27904	1.27864	2.44918	1.24742
PfIL274A07	17-beta hydroxysteroid dehydrogenase type 12B	DV568696	HSD17B12		1.25334	1.06891	1.41433	0.907883	2.20897	1.68944
PfIL249C03	Small inducible cytokine	DV567613	CCL14		1.12774	1.25549	1.51836	1.07599	1.9584	1.56763
PfIL247E07	Protein phosphatase 1 regulatory subunit 12B	DV567536	PPP1R12B		1.10356	1.7154	1.57442	1.32107	1.73412	1.04504
Pp006	Caspase 3	na	CASP3		1.18955	1.11758	1.16356	0.896278	2.59475	1.50344
Contig433	Hemoglobin beta-A chain	DV565345	HBE1		2.75408	1.74927	0.948228	0.686504	0.749528	1.56255
PfIL258B08	Glycine decarboxylase p protein	DV568034	GLDC		1.26763	1.43068	1.14725	1.63935	2.09303	0.861019
PfIL213F12	Growth arrest and DNA-damage-inducible protein alpha	DV566272	GADD45A		1.11393	0.902965	1.48797	1.55418	2.08829	1.27953
PfIL304D01	GTPase activating protein Rap1-GAP	EC379352	RAP1GAP2		2.07601	1.11381	1.38247	0.911358	1.33875	1.60383
PfIL012B09	Tetraspanin 3	EC377643	TSPAN3		1.32891	1.18233	1.71277	1.71411	0.925043	1.56303
PfIL258A07	Orphan nuclear receptor NR1D1	DV568025	NR1D1		1.63463	0.839011	2.00475	1.60113	1.26675	1.06086
PfMX-l2b	Interferon inducible Mx	AJ606083	MX1		0.942709	0.760102	1.57409	2.18162	1.60053	1.24746
PfIL201B04	Coagulation factor X	DV565785	F10		1.91251	1.69559	1.3426	1.071	0.986389	1.29549
Contig893	Fatty acyl-CoA hydrolase precursor, medium chain	DV568068	CES2		0.965858	1.41541	1.71589	1.88252	1.06482	1.23593
PfIL020B09	Carboxymethylenebutenolidase-like	DV565673	CMBL		1.02748	0.865079	1.01514	1.40823	2.51657	1.43981
PfIL277D04	Chemokine (C-X-C motif) ligand 14	EC378928	CCL14		1.19658	0.813139	0.920152	2.5307	1.79118	0.971227
Pp001	Glutathione S-transferase A; 3'UTR	X95199	GSTZ1		1.21675	1.02948	1.26822	1.68497	1.92427	1.05244
PfIL201G03	2-amino-3-carboxymuconate-6-semialdehyde decarboxylase	DV565807	ACMSD		1.37423	0.986069	1.54306	0.802969	1.75124	1.70686
PfIL300C10	Triosephosphate isomerase 1	DV569675	TPI1		1.32748	0.850049	1.01518	1.29356	1.93861	1.7373
PfIL299H04	Acetyl-Coenzyme A acetyltransferase 1 (acetoacetyl Coenzyme A thiolase)	EC379284	ACAT1		0.947081	1.60953	1.34705	1.55068	1.78372	0.851616
PfIL222D01	Transmembrane protein 66	DV566514	TMEM66		0.920256	1.0605	1.51793	1.12037	1.60306	1.85223
PfIL311H03	Partial optokinetic response b	EC379482	TMEM111		0.878664	1.34588	1.75034	1.14394	1.69907	1.22556
PfIL310E09	FK506-binding protein 2 precursor; FK506-binding protein 2 (13kD); FK506 binding protein 2 (13kD); peptidyl-prolyl cis-trans isomerase; rapamycin-binding protein; proline isomerase	EC379456	FKBP2		0.742408	0.964046	1.29215	1.23508	1.70725	2.06666
PfCF2A2	Early growth response 1	AM041906	EGR1		1.2884	1.01768	2.12918	1.04244	1.18591	1.30604
PfIL288F02	Eukaryotic translation initiation factor 4E binding protein 3	DV569222	EIF4EBP3		1.66687	1.23807	1.68268	1.7696	0.543334	1.06601
PfIL221G07	ATPase inhibitor precursor	DV566492	ATPIF1		1.77077	1.7945	1.00396	1.32154	1.02147	1.04148
PfIL266H01	Lamin B1	EC378752	LMNB1		0.900926	1.10632	1.73207	0.9139	1.75107	1.46462
Contig813	Annexin A2	DV565849	ANXA2		2.49243	1.60991	0.994324	0.491617	0.791786	1.4359
PfIL294H05	U6 snRNA-associated Sm-like protein LSm5	DV569488	LSM5		0.865069	1.83662	1.19546	1.35758	1.54224	1.01601
PfIL241E06	Golgi transport 1 homolog A	DV567294	GOLT1A		1.63566	1.1152	1.10563	2.11185	1.06682	0.757904
PfIL316C03	Selenoprotein S	DV570279	SELS		0.859927	1.26945	1.59677	0.896358	1.51343	1.59131
PfIL011H12	Complement factor B/C2-B	DV565599	CFB		1.97459	1.61482	0.800843	0.862899	0.977346	1.49362
Contig955	Peripheral-type benzodiazepine receptor	DV565952	TSPO		2.15259	1.25553	0.899203	1.19596	0.908382	1.29221
PfIL204B08	Plakophilin 3	DV565942	PKP3		1.58622	1.16002	1.25237	2.03235	0.972702	0.693411
PfIL256G08	Arginase, type I; A-I	DV567971	ARG1		2.1354	1.32077	1.25973	1.01222	1.18617	0.782009
PfIL243E01	Solute carrier family 1 member 6	DV567375	SLC1A6		1.38686	0.793501	1.23742	1.2389	1.08149	1.92192
PfIL293H03	Arrestin domain containing 3	DV569448	ARRDC3		1.36321	1.67261	0.958547	1.51396	0.713099	1.42185
PfIL313F01	OTU domain, ubiquitin aldehyde binding 1	EC379523	OTUB1		1.72961	1.35639	1.30989	0.813569	0.830281	1.59228
PfIL294B01	Deleted in azoospermia-associated protein 2	DV569455	DAZAP2		1.65527	1.26063	1.33203	0.907704	0.683181	1.78284
PfIL278F06	Calcium binding and coiled-coil domain 2	DV568889	CALCOCO2		1.71178	1.35062	0.958686	1.79165	0.810983	0.981682
Contig564	Similar to interleukin 25	DV566068	C19ORF10		0.623622	1.10514	1.43764	1.06136	2.02846	1.34263
Contig814	Retinol dehydrogenase type I	DV565887	RDH16		1.52682	1.6516	1.33318	1.2318	0.737777	1.09456
PfIL238B10	Ras-related GTP-binding protein ragA	EC378316	RRAGA		1.09327	1.04882	0.689618	2.08102	1.18072	1.45724
Contig442	Glutamate carboxypeptidase (Darmin)	DV565346	CNDP2		1.64559	0.971752	0.985126	1.05511	1.63067	1.23503
PfIL278C07	Proteasome (prosome, macropain) subunit, alpha type, 6	DV568871	PSMA6		0.773549	1.08114	1.34063	0.720364	2.11094	1.4794
PfIL288E08	Alpha-type globin	EC379099	HBZ		1.79505	1.40783	1.2274	1.23215	0.907313	0.912296
PfIL263A03	Poly A binding protein, cytoplasmic 1	DV568263	PABPC1		1.10917	1.58098	1.75022	0.935548	1.20305	0.89342
PfIL243H10	Tumour protein P53 inducible nuclear protein 2	DV567392	TP53INP2		1.70473	1.21522	1.00724	1.69113	0.842592	1.00933
PfIL259D04	Signal peptidase complex subunit 3 homolog	EC378645	SPCS3		0.659425	0.977871	1.06249	1.1281	2.40582	1.21424
PfIL319H01	Proteasome subunit beta type 1 precursor (EC 3.4.25.1)	DV570420	PSMB1		0.849152	1.00509	1.52926	0.998823	1.42841	1.63689
Contig362	Glutathione S-transferase (GST-A)	DV565329	GSTO1		1.08581	0.861771	1.37857	1.15041	1.95568	1.00946
Contig525	UDP-glucuronosyltransferase (UGT3 gene) *(K)	AJ291986	UGT1A1		0.852729	0.590133	1.18774	0.791121	2.11723	1.88463
Contig44	Chemotaxin	DV565320	LECT2		1.69344	1.01341	0.985809	1.69818	1.16401	0.840531
PfIL231G07	Zinc finger protein 706	EC378229	ZNF706		0.722565	1.14196	1.05711	1.91225	1.57119	0.973063
PfIL264E11	Eukaryotic translation initiation factor 4E binding protein 3	DV568337	EIF4EBP3		1.47691	1.10294	1.07125	2.07286	0.603689	1.03069
PfIL007D09	Mitochondrial ATP synthase c-subunit (P3)	DV565448	ATP5G2		0.929487	0.964107	1.16423	1.06421	2.11253	1.10739
Contig706	F1F0-type ATP synthase subunit g	DV565486	ATP5L		0.582311	0.892256	1.43296	1.16794	1.95097	1.26125
Contig453	Histamine N-methyltransferase	DV568029	HNMT		1.01075	0.610813	1.20116	0.994363	1.88781	1.54923
Contig446	6-phosphogluconate dehydrogenase (PGD)	DV568594	PGD		0.968692	0.824239	1.05816	0.765273	2.45084	1.14267
PfIL009F04	Cyclin G1	DV565544	CCNG1		1.94492	1.45607	1.20304	1.47292	0.535007	0.575509
PfIL221H09	Aldose 1-epimerase	DV566494	GALM		1.12895	0.937188	0.705093	1.4791	1.73948	1.12501
PfIL008H04	Peptidylprolyl isomerase E (yclophilin E)	EC377614	PPIE		0.625845	1.24559	0.986493	1.15449	1.86281	1.2271
PfIL273D04	Proteasome beta-subunit C5 (Proteasome (Prosome, macropain) subunit, beta type, 1)	DV568672	PSMB1		0.632848	0.792852	1.16712	0.93679	2.19603	1.34242
PfIL251G11	Alpha-N-acetylgalactosaminidase	DV567743	GLA		1.15345	0.844746	0.802659	1.85476	0.893933	1.49781
PfPRX-o4	Peroxiredoxin	AJ292084	PRDX1		0.712625	0.822986	1.31268	1.00671	1.61863	1.55604
PfIL007A09	Butyrophilin 3	EC377586	BTNL2		1.35806	1.37146	0.807718	1.72861	0.885366	0.83557
PfGST-o1	Glutathione-S-transferase (omega class)	AJ310428	GSTO1		0.939979	1.09354	1.03186	1.33436	1.81402	0.754073
PfIL201C02	Prothrombin (EC 3.4.21.5)	DV565789	F2		1.22039	1.06058	1.42437	0.762512	0.913111	1.56699
Contig909	Putative ISG12 protein (isg12 gene)	DV565511	FAM14A		0.916882	0.701211	0.975223	1.54601	1.50354	1.30296
PfIL268A06	Microsomal glutathione S-transferase 3	DV568479	MGST3		0.72093	0.81082	0.97921	1.43284	1.70726	1.29406
PfIL250H07	BUB3 budding uninhibited by benzimidazoles 3-like protein	DV567695	BUB3		0.949313	1.23496	0.789654	1.64873	1.46187	0.845586
PfIL241H10	Metaxin 2	EC378382	MTX2		0.620384	0.964282	0.949673	1.19157	1.9773	1.226
PfIL249H12	Sorting nexin-12	DV567651	SNX12		0.955993	0.842601	1.10249	0.753041	1.79556	1.46982
PfIL314E01	Coatomer epsilon subunit	DV570223	COPE		0.763708	1.03063	1.43018	0.902105	1.36405	1.40648
PfIL273E10	Mitochondrial ribosomal protein L52	EC378844	MRPL52		0.815409	0.901619	0.952347	1.36495	1.73658	1.12534
Contig423	Calreticulin	AJ543371	CALR		0.653051	0.555154	1.09814	1.11031	1.87008	1.6045
Contig492	c-Fos	AJ508730	FOS		1.26527	0.712629	1.68434	1.03198	1.48918	0.694992
PfIL305H05	Nipped-B homolog	DV569910	NIPBL		0.750177	1.45219	1.4123	1.05012	1.41894	0.790014
PfIL255E12	Heat shock protein gp96	DV567919	HSP90B1		0.613872	0.776253	1.1582	0.99747	1.55964	1.76516
Contig774	MHC II invariant chain	AJ508542	CD74		0.815724	0.693274	0.900407	2.0056	1.23728	1.18373
PfIL227A02	Ras-GTPase activating protein SH3 domain-binding protein 2	DV566688	GIMAP4		1.3412	1.11747	1.28699	0.734913	0.718876	1.61462
PfIL279F06	DKFZP586M0617 protein	DV568934	IHPK2		1.72314	0.97824	1.35939	1.07381	0.889517	0.77725
PfIL232C02	ATPase family, AAA domain containing 1	DV566888	ATAD1		0.787492	1.01243	1.64351	0.962194	1.29311	1.07872
PfIL228G09	Cathepsin S cysteine protease	EC378174	CTSS		0.758702	0.743868	0.779541	2.21419	1.32616	0.942864
PfIL280B08	Derlin-2 (Degradation in endoplasmic reticulum protein 2)	DV568954	DERL2		0.659283	0.878179	1.25378	1.02681	1.66467	1.27509
PfIL299G03	Abhydrolase domain containing 6	DV569653	ABHD6		0.681827	1.13983	1.12867	1.49669	1.12484	1.15011
PfIL244E12	Insulin-like growth factor IA precursor (IGF-IA)	DV567425	IGF1		1.30426	1.2101	1.15881	1.18221	0.56563	1.29642
PfIL259D09	Serine hydroxymethyl transferase 1 * (K)	DV568099	SHMT1		0.990208	0.873611	1.03904	0.779437	1.97117	1.06319
PfIL205D01	Interleukin-8 variant	DV565984	IL8		1.19926	1.75616	1.16213	0.816127	0.873298	0.892281
PfIL276F07	Ubiquitin carboxyl-terminal hydrolase isozyme L5	DV568796	UCHL5		0.728573	0.948862	1.20171	0.974393	1.61021	1.22696
PfIL300D05	Fertilization envelope outer layer protein	EC379291	VMO1		1.44189	1.14771	0.717403	1.58989	0.846504	0.920879
PfIL240F09	DEAD (ASP-GLU-ALA-ASP) box 17	DV567245	DDX17		1.48922	1.23608	1.09857	1.43571	0.569535	0.832538
PfIL013A02	Oligosaccharyl transferase 48 kDa subunit	DV565633	DDOST		0.774604	0.731417	1.43534	0.910978	1.21351	1.59509
PfIL217H04	HSPA (heat shock 70kDa) binding protein, cytoplasmic cochaperone 1	DV566385	HSPBP1		0.5773	1.17226	1.21838	0.946939	1.43165	1.281
PfIL275G08	Biliverdin reductase A	DV568765	BLVRA		0.959462	1.05791	0.869419	0.702095	1.10666	1.91098
PfIL230G02	Alpha-2-macroglobulin	DV566828	PZP		0.914651	0.666334	1.14188	0.755711	1.58797	1.53291
PfIL294C08	Hsp70 binding protein	DV569462	HSPBP1		0.689933	0.771601	1.32147	0.559761	1.76279	1.47579
PfIL012B08	Apolipoprotein F	DV565607	APOF		0.951272	0.854927	0.944205	0.785903	1.90111	1.13859
PfIL311A04	Hypothetical protein LOC393578	DV570085	KIAA0776		0.703146	1.23344	1.26379	0.779294	1.27061	1.29837
Contig6	SPC18 protein, signal peptidase complex (18kD)	DV565884	SEC11A		0.533103	0.981225	1.18858	0.780665	1.66057	1.38106
Contig847	Coiled-coil-helix-coiled-coil-helix domain containing 3	DV568929	CHCHD3		0.757086	0.840498	0.967605	1.51388	1.53547	0.900527
PfIL298A04	Dehydrogenase E1 and transketolase domain containing 1	DV569588	DHTKD1		0.759168	0.982244	1.23485	0.803722	1.59217	1.13067
PfIL248F11	Cytochrome P450 7B1 (Oxysterol 7-alpha-hydroxylase) CYP7B1	EC378489	CYP7B1		1.39481	1.32023	0.970072	1.4457	0.591614	0.768314
PfIL267H12	Selenium binding protein 1 ~ (Lep)	DV568476	SELENBP1		0.938562	0.575009	0.803605	1.46435	1.13779	1.53906
PfIL252G04	Vitamin K epoxide reductase complex subunit 1	DV567794	VKORC1L1		0.713849	0.565818	1.09616	0.979763	1.72678	1.37235
Contig723	Hemoglobin alpha chain	AJ605278	HBZ		1.82694	1.12781	0.828089	0.532686	0.769634	1.36441
PfIL298B07	Apolipoprotein H precursor	DV569596	APOH		1.41565	1.17077	0.649055	0.9595	1.15609	1.05882
Contig960	Peptidyl-proline isomerase	DV565676	FKBP11		0.649543	0.946528	1.34964	0.729102	1.5649	1.14797
PfIL243A10	Proteasome (Prosome, macropain) subunit, beta type, 5	DV567359	PSMB5		0.639203	0.779433	0.961641	1.16284	1.67985	1.14513
Contig531	60S ribosomal protein L13	DV565391	RPL13		0.695049	1.46422	1.23667	0.833834	1.12714	1.00102
PfIL224A07	Prohibitin	EC378097	PHB		0.638183	0.87043	0.920371	0.936492	1.85873	1.1253
PfIL312A09	Coagulation factor V precursor	EC379485	F5		1.3981	1.42653	1.06734	0.836986	0.602209	1.00647
PfIL259A02	Proteasome (prosome, macropain) 26S subunit, non-ATPase, 2	DV568073	PSMD2		0.627847	0.870729	1.42598	0.869003	1.27729	1.25827
Contig889	Cofilin 2	EC377585	CFL2		0.828326	0.798748	0.824782	0.901743	1.12963	1.84331
PfIL275E06	Nipsnap homolog 3A	DV568752	NIPSNAP3A		0.716615	0.642324	0.777539	1.416	1.49578	1.27807
PfIL237F09	GC-rich promoter binding protein 1-like 1	DV567122	GPBP1L1		0.92028	1.25557	0.940742	1.76687	0.611328	0.795801
PfG6D-l4	Glucose-6-phospphate dehydrogenase	AJ310438	G6PD		0.691742	0.884445	0.921761	0.52836	2.10458	1.14892
PfCB5-l4	Transketolase	AJ298328	TKT		1.05784	0.890714	0.845191	0.753555	1.76868	0.951159
Contig291	ER-resident chaperone calreticulin	DV565702	CALR		0.532654	0.562247	0.836325	1.07661	1.60739	1.57351
PfTUB-o4	Alpha-tubulin	AJ291985	TUBA1A		0.560329	0.793697	1.20996	0.646582	1.79509	1.13864
PfIL232B11	Benzodiazapine receptor (peripheral)	DV566887	TSPO		1.48643	0.879934	0.763552	1.0953	0.833636	1.08214
PfIL276D01	60S ribosomal protein L13a	DV568784	RPL13A		0.585181	0.986408	1.62316	1.17818	1.06537	0.68884
PfGLR-o24	RNA terminal phosphate cyclase domain 1	AJ508551	RTCD1		0.631489	1.03644	1.44935	1.10065	1.22134	0.667313
PfIL250C05	Glucose-6-phosphate dehydrogenase	DV567664	G6PD		0.798541	0.720855	0.91312	0.574549	2.12166	0.944504
PfIL218B11	Membrane protein, palmitoylated 1, 55kDa	DV566391	MPP1		1.29233	0.77742	0.683694	1.72914	0.852009	0.725881
Contig540	60S ribosomal protein L24	DV565577	RPL24		0.670088	1.31083	1.09995	1.11116	1.16628	0.687409
Contig712	Probable ergosterol biosynthetic protein 28 similar to Hs C14orf1	DV568869	C14ORF1		0.656671	0.64516	0.802003	1.33358	1.75669	0.834055
PfBR1A5	Cytochrome P450, CYP2J2	AJ580513	CYP2J2		1.20517	0.917426	1.45615	0.781938	0.565529	1.09929
PfIL304E11	Glucokinase	DV569798	GCK		1.327	0.734091	0.640948	0.746389	1.59611	0.969785
Contig620	Retinol binding protein II, Cellular (CRBP-II)	DV565325	RBP2		1.76875	1.35536	0.884694	0.656874	0.391598	0.954755
PfIL204D12	Selenoprotein S	DV565953	SELS		0.671106	0.842726	0.944966	0.664024	1.6639	1.19393
PfIL254H03	TRK-fused gene	DV567882	TFG		0.661174	0.913148	1.21882	0.723575	1.14992	1.3139
PfIL308H05	Proteasome, 26S, non-ATPase regulatory subunit 6	DV570012	PSMD6		0.607508	0.965516	1.04865	0.652595	1.76593	0.925775
PfCB5-l1	ETS variant 6 (TEL oncogene)	AJ409365	ETV6		1.04605	0.912457	1.30795	0.629622	0.777531	1.25911
PfIL001F03	RNA-binding protein with serine-rich domain 1	DV565458	RNPS1		1.29999	1.11182	1.1263	0.695352	0.623591	1.06495
PfIL305F02	CCAAT/Enhancer binding protein epsilon	DV569902	CEBPE		0.817006	1.03197	1.60321	0.725153	0.830643	0.897423
PfIL244H12	Solute carrier family 39 (zinc transporter)	EC378429	SLC39A9		0.718169	1.19973	0.95139	0.748363	1.45801	0.819858
PfIL239F01	MGC80619 protein, Hs C11orf10	DV567199	C11ORF10		0.710065	0.705461	1.15969	0.730156	1.34631	1.24133
Contig366	Pentraxin	DV565701	NPTX1		0.981161	0.771227	0.580815	0.607727	0.642565	2.28359
Contig752	Liver-expressed antimicrobial peptide 2A	DV565675	LEAP2		1.65469	0.754372	0.805005	0.566454	0.88258	1.18581
PfIL003B10	Lectin, mannose-binding, 1	DV565350	LMAN1		0.474008	0.818324	1.01871	0.81774	1.68536	1.02594
Contig284	Eukaryotic translation initiation factor 4A	DV567731	EIF4A2		1.35616	1.25342	1.03935	1.07734	0.545807	0.559003
PfIL001H02	Aldehyde reductase 6	DV565466	MIOX		0.997985	0.566017	1.27724	1.65964	0.537401	0.788934
Contig201	Protein disulfide isomerase related protein	DV569417	PDIA4		0.504455	0.537759	0.832525	0.855094	1.80749	1.27428
PfIL231C07	Heat shock cognate 71 kDa protein	DV566849	HSPA8		0.781155	1.24836	1.43276	0.777904	0.904738	0.651579
Contig637	B-cell receptor-associated protein BAP37	DV567622	PHB2		0.526192	0.91942	1.20708	0.605661	1.42317	1.10432
Contig1015	Cytidine deaminase	DV565397	CDA		1.35504	1.07942	1.00821	0.808694	0.595467	0.931517
PfIL243D12	Ribosomal protein L21	EC378407	RPL21		0.573191	1.07712	1.22026	0.943147	1.01986	0.910151
Contig298	Alpha tubulin	DV566165	TUBA4A		0.489634	0.688307	1.10667	0.534576	1.93936	0.97887
Contig340	Eukaryotic translation initiation factor 3, subunit 9 eta, 116kDa	DV565373	EIF3B		1.00429	1.4333	1.31058	0.799432	0.585341	0.584934
PfIL202G12	Hypoxanthine phosphoribosyltransferase 1	EC377742	HPRT1		0.695691	0.77931	0.931599	0.653755	1.61503	1.03692
PfIL318H11	60S ribosomal protein L10	DV570392	RPL10		0.527662	1.11746	1.11608	0.946916	1.07138	0.912833
PfIL006A05	Pyrophosphatase (inorganic) 2	DV565379	PPA2		0.670793	1.30004	0.928192	1.24446	0.960623	0.586328
PfIL224D07	Creatine kinase, brain	DV566591	CKB		0.838778	0.945631	0.652649	1.48773	1.0507	0.71231
PfIL266F02	Proteasome 26S non-ATPase subunit 3	DV568418	PSMD3		0.572281	0.77383	1.24567	0.695598	1.25713	1.12616
Contig695	DC2 protein	DV565601	DC2		0.601848	0.81858	1.05335	0.635305	1.28017	1.26812
PfIL253F11	NADH dehydrogenase subunit 3	DV567827	MT-ND3		0.811233	0.912357	0.899653	0.55839	0.949034	1.51057
Contig1041	Cytochrome c oxidase subunit VIIb precursor	EC379030	COX7B		0.752889	0.827169	0.714677	1.49581	0.832633	0.991756
PfIL236G06	Prostaglandin E synthase (cytosolic)	DV567082	PTGES3		0.513598	0.866289	1.17595	0.476811	1.4329	1.13695
PfIL008H10	Peptidylprolyl isomerase F	DV565866	PPIF		0.525723	0.899123	0.958262	0.972227	1.36471	0.860143
PfIL234C11	Tubulin, beta 2C	EC378266	TUBB2C		0.569709	0.764787	1.13426	0.623188	1.4843	1.00184
PfIL020H10	STEAP family member 4 ~ (Lep)	EC377685	STEAP4		0.637961	0.925089	0.795691	1.31233	1.18417	0.720144
Contig501	Apolipoprotein B (including AG(X) antigen)	AJ580739	APOB		1.12853	1.45421	0.9153	0.476881	0.747219	0.810429
Pa016	Cytochrome P450 2X	AY225104	CYP2J2		0.856124	0.662369	0.624516	1.0029	1.01338	1.36697
PfIL267E07	Solute carrier family 25 (carnitine/acylcarnitine translocase), member 20	EC378759	SLC25A20		0.49882	0.829496	0.865405	0.838503	1.17309	1.29866
PfIL234G04	Cross-immune reaction antigen PCIA1	EC378277	DDA1		1.15311	1.06238	0.785799	1.26888	0.567233	0.66494
PfIL268D09	Aldehyde reductase (aldose reductase)-like 6	DV568489	MIOX		0.919658	0.543994	1.12906	1.57271	0.499692	0.804917
PfIL140H11	Putative nucleic acid binding protein RY-1	DV565778	RY1		0.525275	0.892179	0.832243	0.829598	0.981848	1.39871
PfIL226E10	Proteasome (Prosome, macropain) subunit, beta type, 5	DV566673	PSMB5		0.606981	0.780687	0.887584	0.933788	1.3707	0.87687
PfIL299D04	Aldose reductase-related protein 2	DV569644	AKR1B10		0.592564	1.03542	0.871324	0.770843	0.91949	1.26361
PfIL254G11	Alcohol dehydrogenase class III	DV567880	ADH5		0.480301	0.625869	0.948824	0.893704	1.29924	1.1581
PfIL272B10	Phospholipid hydroperoxide glutathione peroxidase B	DV569037	GPX4		0.554438	0.74275	0.923369	0.789943	1.47054	0.916063
PfIL216B11	Isocitrate dehydrogenase 2 (NADP+), mitochondrial	DV566345	IDH2		0.439628	0.594951	0.922762	0.62008	1.69293	1.123
Contig274	Aldehyde reductase (aldose reductase)-like 6	DV565358	MIOX		0.976018	0.594564	1.15063	1.45705	0.455716	0.756844
PfIL254H09	Transmembrane trafficking protein TMP21	DV567887	TMED10		0.415688	0.730603	0.835252	0.761943	1.55546	1.07617
Contig685	High choriolytic enzyme 1 precursor	DV567267	ASTL		0.70352	0.674259	0.587463	1.57417	1.02103	0.811744
PfIL253A03	Abhydrolase domain containing 12	EC378544	ABHD12		0.671646	0.660341	0.780689	0.810043	1.31572	1.11878
PfIL011D03	Trf (TATA binding protein-related factor)-proximal homolog	EC377630	MED20		1.30948	1.13761	0.67702	0.51131	0.63154	1.07571
PfIL235C10	Formiminotransferase cyclodeaminase	DV567027	FTCD		0.490716	0.724028	0.683597	1.06887	1.02518	1.32734
PfCF2B2	Eukaryotic translation initiation factor 4E member 3	AJ605127	EIF4E3		1.23734	1.09679	0.587364	1.24419	0.731258	0.410758
PfIL251G03	Upregulated during skeletal muscle growth 5	DV567739	USMG5		0.514826	0.893764	1.33877	0.859783	1.03017	0.653657
PfIL209A06	Asparaginyl-tRNA synthetase	DV566130	NARS		0.47488	0.57694	0.956355	0.912866	1.42378	0.941565
PfIL246B09	Malate dehydrogenase 2, NAD (mitochondrial)	DV567484	MDH2		0.523009	0.787937	1.05334	0.870894	1.04679	0.966294
PfHEM-l2	Glycoprotein 36B	AJ306235	LMAN2		0.621985	0.674295	0.983966	0.651152	1.33317	0.982983
Contig714	Proteasome 26S ATPase subunit 5, MSUG1	DV568919	PSMC5		0.56617	0.648495	0.864285	0.730082	1.40875	1.0216
PfIL002B02	DnaJ (Hsp40) homolog, subfamily C, member 5	DV565477	DNAJC5		0.847083	0.822241	0.947723	0.50964	0.783115	1.30045
PfIL209A08	ATP binding protein associated with cell differentiation	DV566132	TXNDC9		0.446607	0.666966	0.803795	0.90722	1.54196	0.840537
PfIL244A09	DKFZP586J0523 Protein	EC378414	NPDC1		0.737208	0.766135	0.813206	1.55839	0.806865	0.507872
PfIL232H02	Lipocalin-type prostaglandin D synthase-like protein	DV566918	PTGDS		0.934088	1.2824	1.0285	0.610042	0.433617	0.897785
Contig1012	Cholesteryl ester transfer protein	DV565910	CETP		0.522982	0.737943	0.811066	1.12873	0.826681	1.14898
PfIL233D09	Astacin-like metallopeptidase (M12 family)	DV566938	ASTL		0.808518	0.701604	0.526139	1.2941	0.905041	0.930017
PfIL259C04	Elastase 2 precursor	EC378642	ELA1		0.697332	0.623135	0.643955	1.24903	1.06967	0.819802
Contig729	Pancreatic elastase 1	DV565694	ELA2A		0.789265	0.708921	0.600327	1.10996	0.8555	1.03537
Contig914	Trypsinogen 2 precursor	DV568965	PRSS2		0.65139	0.675873	0.620343	1.15467	1.01137	0.979727
PfIL209E08	6-pyruvoyl tetrahydrobiopterin synthase	DV566143	PTS		0.709822	0.776776	0.533723	1.20887	1.02034	0.838749
PfIL232B08	Neutral amino acid transporter	DV566885	SLC1A4		0.984366	0.741144	0.643799	1.25617	0.6365	0.815807
PfIL230G07	SEC22, vesicle trafficking protein-like 1B	DV566831	SEC22B		0.55728	0.820786	0.786683	0.669968	1.47992	0.762885
PfCR1C4	FK506 binding protein 3, 25kDa	AM041918	FKBP3		0.469716	0.838844	1.03187	0.855236	0.991625	0.876804
PfOGG-o2	Zona pellucida protein C	AJ310719	ZP3		0.559899	0.671468	0.907826	0.506178	1.12925	1.27922
Contig1108	Elastase 2-like protein	DV565408	ELA1		0.648262	0.711997	0.556408	1.29357	1.00787	0.834814
PfIL319C07	L-lactate dehydrogenase A	DV570402	LDHA		0.963002	0.643398	1.21555	0.688561	0.851844	0.672755
PfIL286E01	Transcription factor BTF3	DV569138	BTF3		0.765119	1.08156	1.14678	0.796799	0.507723	0.715229
PfIL233E09	40S ribosomal protein S3	DV566945	RPS3		0.559457	1.0155	1.00637	0.852954	0.69558	0.857999
Contig456	MAP kinase-interacting serine/threonine kinase 2	DV567339	MKNK2		1.44595	0.82228	0.89163	0.719193	0.545452	0.543873
PfIL318D02	Elastase 1	DV570368	ELA1		0.70075	0.656635	0.671808	1.34016	0.883134	0.712974
PfIL237C04	p24 delta1 putative cargo receptor	DV567105	TMED10		0.427975	0.597533	0.841891	0.539031	1.44836	1.0977
PfIL300H12	Hypoxanthine phosphoribosyltransferase 1	DV569704	HPRT1		0.669762	0.74783	0.653905	0.700249	1.16712	1.01211
Contig248	Dehydrogenase/3-ketoacyl-Coenzyme A thiolase	DV566889	HADHB		0.412816	0.669962	0.905654	0.530199	1.16818	1.2585
Contig1079	Trypsinogen 2 precursor	DV565318	PRSS2		0.611841	0.724532	0.550792	1.16628	0.888326	0.95594
Contig919	Chymotrypsinogen 1	AJ543349	CTRL		0.643458	0.692954	0.54526	1.1166	1.01889	0.878809
PfIL215C03	Elastase 4 precursor	DV566319	ELA2A		0.7535	0.662367	0.629912	1.16479	0.902287	0.768657
PfIL295D10	Solute carrier family 25 member 3	DV569510	SLC25A3		0.532261	0.594845	0.991505	0.728126	1.06748	0.964285
Pa003	Ribosomal Protein S3A	na	RPS3		0.519926	0.821815	1.14813	0.831209	0.877207	0.676536
PfIL266E10	Hypoxanthine phosphoribosyltransferase 1	EC378750	HPRT1		0.600907	0.652901	0.697717	0.704489	1.33781	0.861771
Contig681	Elastase 1	AJ508725	ELA1		0.655738	0.718744	0.517751	1.22305	0.952763	0.778627
PfIL278G09	Liver-specific uridine phosphorylase	DV568896	UPP2		1.29416	0.901768	0.796631	0.856176	0.415634	0.578882
Contig633	Chymotrypsin B precursor	DV567597	CTRB2		0.641447	0.675838	0.573922	1.0593	0.998617	0.891858
PfIL239A04	Sex hormone-binding globulin	EC378326	SHBG		0.734778	0.551779	0.618471	1.17769	0.693028	1.05095
PfIL218B01	Betaine-homocysteine methyltransferase	DV566389	BHMT		0.445415	0.729773	1.42844	0.949763	0.630741	0.635614
Contig23	High choriolytic enzyme 1 precursor	DV565380	ASTL		0.702393	0.622056	0.560825	1.20886	0.859677	0.827249
PfIL273G12	Prostaglandin E synthase 3, telomerase binding protein, p23	DV568689	PTGES3		0.440108	0.692533	0.986938	0.468791	1.24254	0.94287
PfIL284G03	B-cell leukemia/lymphoma 3	EC379043	BCL3		0.713985	0.579414	1.32607	0.624348	0.736959	0.790965
PfILCOMA06	Perforin 1 (pore forming protein)	DV570468	PRF1		0.698259	0.581173	0.499223	1.29813	0.912121	0.777772
PfIL316H08	Mitochondrial glutamate carrier 1	DV570303	SLC25A22		0.606662	0.605411	1.2089	0.602565	0.972248	0.761397
PfIL007A06	Carboxypeptidase B~ (Lep)	DV565430	CPB1		0.663629	0.684498	0.569351	1.13063	0.927707	0.766294
Contig998	Elastase 3	DV566511	ELA2A		0.65979	0.644066	0.506254	1.13094	0.909855	0.885709
Contig738	High choriolytic enzyme 1 precursor	DV565583	ASTL		0.606341	0.597907	0.536253	1.04965	1.05571	0.885541
PfG78-g1	GRP-78 (BiP)	AJ305218	HSPA5		0.524521	0.555676	0.902352	0.501668	1.2914	0.906794
PfIL208E12	ER lumenal L-amino acid oxidase	DV566108	IL4I1		0.779784	0.41025	0.538853	0.88592	0.756545	1.31004
Contig568	Carboxypeptidase A2	AJ605120	CPA2		0.68562	0.595238	0.534229	1.10507	0.938847	0.808126
PfIL288H10	Histidyl-tRNA synthetase	DV569238	HARS		0.428431	0.676454	0.758209	0.482343	1.42249	0.884636
Contig1019	Phosphoglycerate mutase 1	DV566733	PGAM1		0.689925	0.583303	0.502067	0.63513	1.02759	1.20611
PfCF2C3	Ran protein - member of Ras superfamily, nuclear GTP-ase.	AJ605272	RAN		0.526357	0.916926	0.864555	0.580182	1.02491	0.67997
PfIL270C09	Peroxisomal short-chain alcohol dehydrogenase	DV568567	DHRS4		0.530338	0.814234	0.62016	0.954432	0.857799	0.801668
Contig941	Trypsin	DV565421	PRSS2		0.628043	0.699905	0.499128	1.05945	0.814565	0.860899
PfIL312F10	Small nucleolar ribonucleoprotein polypetides B and B1	EC379503	SNRPB		0.846404	0.602685	0.515313	0.859054	0.64609	1.07527
PfIL202H02	Chaperonin containing TCP-1 delta	EC377743	CCT4		0.649846	0.677703	1.12742	0.516817	0.765042	0.80326
PfIL011C04	Splicing factor arginine/serine-rich 3	DV565574	SFRS3		0.554388	0.836836	1.03237	0.413392	0.966127	0.725723
Contig854	Hypothetical protein LOC336303, Hs C20orf149	DV566694	C20ORF149		1.06826	0.623406	0.440481	0.595998	0.703175	1.09747
PfIL001H05	RAB32, member RAS oncogene family	DV565469	RAB32		0.526851	0.742087	0.761554	0.552985	1.09414	0.850196
PfIL277B08	Ubiquitin-conjugating enzyme E2 variant 2 (Ube2v2)	DV568816	UBE2V2		0.510822	0.769809	0.669926	0.931594	0.961687	0.6757
PfIL248H04	PRP31 pre-mRNA processing factor 31 homolog	DV567589	PRPF31		0.443979	0.81229	0.778795	0.667036	0.949382	0.853384
PfIL296H07	Hypothetical protein HSPC268	DV569555	C7ORF55		0.614869	1.15034	0.634403	0.625836	0.958395	0.515469
PfIL251D12	Succinate dehydrogenase Ip subunit	EC378525	SDHB		0.576139	0.620695	0.618398	0.567905	1.14961	0.943471
PfIL226C07	cDNA clone Pf_IL_244H05 similar to Hs C20orf149	EC378135	C20ORF149		0.955499	0.603621	0.438721	0.715055	0.949433	0.812265
PfIL292F06	Splicing factor, arginine/serine-rich 11	DV569407	SFRS11		0.785006	0.739723	0.898199	0.71507	0.601177	0.731952
PfIL208A11	Stress-associated endoplasmic reticulum protein 1	DV566093	SERP1		0.546436	0.685985	0.58976	0.817356	1.03434	0.795261
PfIL284F09	B5 receptor	DV569065	EIF3M		0.704378	1.15362	0.862884	0.794576	0.477344	0.454342
Contig885	Perforin 1 (pore forming protein)	DV565660	PRF1		0.642972	0.569633	0.460864	1.07272	0.908147	0.790037
PfIL225D09	Betaine-homocysteine methyltransferase	na	BHMT		0.373786	0.816619	1.17153	0.852943	0.609302	0.591465
Contig418	Alpha amylase	DV567943	AMY1C		0.653681	0.611073	0.528208	1.16854	0.746263	0.691279
Contig648	carboxypeptidase A1	DV565300	CPA1		0.626253	0.598979	0.461094	1.06162	0.819661	0.809986
PfIL235H07	Thioredoxin-like 1	DV567052	TXNL1		0.463211	0.58443	0.710796	0.567202	1.2225	0.764879
PfIL257A02	cDNA clone no520h12 sim to transducin (beta)-like 2	DV567980	TBL2		0.558017	0.63766	0.887065	0.47453	0.984262	0.767123
Contig589	Hemoglobin alpha-A chain	DV565340	HBZ		0.650655	0.594825	0.49164	0.988827	0.782127	0.785826
Contig850	Intrinsic factor	AJ580757	TCN1		0.583783	0.523062	0.611548	1.02559	0.605601	0.933158
Contig864	Phospholipase A2 precursor	DV565680	PLA2G1B		0.614267	0.509248	0.487612	1.12862	0.775564	0.755831
PfIL272A09	Protein FAM13A1 isoform 3	EC378823	FAM13A1		0.681524	0.872422	0.601614	1.14962	0.40472	0.523907
PfIL240B03	GABA(A) receptor-associated protein like 2	DV567219	GABARAPL2		0.985923	0.723422	0.693826	0.739056	0.450531	0.625101
PfIL292B11	TAR DNA-binding protein 43 (TDP-43).	EC379162	TARDBP		0.786519	0.817417	0.712441	0.913212	0.45402	0.488428
PfIL254C09	Nuclear ribonucleoprotein E	DV567853	SNRPE		0.483377	0.630481	0.703653	0.48649	0.80463	1.04025
PfIL243A11	28S ribosomal protein S12, mitochondrial precursor (S12mt)	DV567360	RPS23		0.544393	0.586853	0.512704	0.744382	0.697542	1.05669
PfBR1F6	Eukaryotic translation initiation factor 4E binding protein 1	AJ578020	EIF4EBP1		0.76531	1.06494	0.81419	0.776879	0.275672	0.438561
PfIL231G08	Basic transcription factor 3-like 4	EC378230	BTF3L4		0.442964	0.736216	0.885224	0.562494	0.86223	0.642981
PfIL256D11	Selenide water dikinase 2	DV567956	SEPHS2		0.354112	0.481187	0.655576	0.640611	1.22298	0.767091
PfIL234C07	Helicase DDX32	EC378265	DHX32		0.835658	0.613586	0.615581	0.979953	0.51436	0.544696
PfIL222F11	Coatomer protein complex, subunit beta 1	DV566527	COPB1		0.461697	0.594478	0.650798	0.48796	0.783692	1.08497
PfIL279B11	KIAA0232 protein	EC378963	KIAA0232		0.67327	0.624526	0.540149	0.580246	0.55968	1.07401
Contig290	Cathepsin L	AJ580013	CTSL1		0.944406	0.623334	0.739939	0.791817	0.383995	0.551422
Contig693	Selenoprotein M	DV568408	SELM		0.544452	0.48918	0.502958	1.2224	0.674972	0.593367
PfIL223D11	Eukaryotic translation initiation factor 4E binding protein 1	DV566557	EIF4EBP2		0.724477	0.919007	0.591581	0.738089	0.316515	0.709266
PfCAT-o23	Twist neighbor	AJ508546	TWISTNB		0.637926	0.816983	0.828761	0.707301	0.389324	0.597481
PfIL251D10	Cathepsin	DV567722	CTSL2		0.739236	0.545531	0.462679	0.422598	0.753423	1.03057
Contig473	C-type lectin 1	DV568963	NCAN		0.58616	0.59371	0.690606	0.861116	0.67243	0.533477
PfIL272D07	Mediator of RNA polymerase II transcription, subunit 10 homolog	EC378828	MED10		0.467557	0.691904	0.570772	0.592379	0.972681	0.633733
PfIL272C08	Autophagy protein 12-like (APG12-like)~(Lep)	DV569044	ATG12		0.826659	0.640011	0.493061	0.715296	0.449169	0.783618
PfIL011E04	Hypothetical protein XP_685177, Hs C7orf57	DV565581	C7orf57		0.724365	0.867107	0.706927	0.656083	0.422229	0.521822
Contig258	Translocase of inner mitochondrial membrane 9 homolog	DV566566	TIMM13		0.608595	0.541625	0.540577	0.530258	0.747044	0.929181
PfIL285G09	DEAD (ASP-GLU-ALA-ASP)box polypeptide 6	EC379057	DDX6		0.420793	0.574889	0.855311	0.470583	0.746473	0.823221
PfIL273G10	Complement factor H	EC378853	CFH		0.884108	0.764776	0.670272	0.586671	0.398741	0.516992
PfCF1H12	Thioredoxin-like 1	ay310335	TXNL1		0.437328	0.509512	0.714103	0.455575	1.05364	0.647337
PfCF1D9	Spermidine/spermine N1-acetyltransferase	AJ605285	SAT1		0.733636	0.420105	0.626965	0.6667	0.398626	0.962142
PfIL214H11	Synaptotagmin binding, cytoplasmic RNA interacting protein ~ (Lep)	DV566311	SYNCRIP		0.454724	0.629512	0.619678	0.450288	0.765667	0.826105
Contig256	Mibp beta 1 integrin binding protein 2	DV567021	ITGB1BP3		0.776187	0.893461	0.63513	0.77491	0.330639	0.320709
PfIL286H12	Chromodomain helicase DNA binding protein 1	DV569156	CHD1		0.544391	0.554649	0.765023	0.437279	0.50964	0.89754
PfILCOMD12	Protein arginine methyltransferase 1	DV570489	PRMT1		0.578846	0.721797	0.627434	0.879562	0.357072	0.515923
PfIL235A07	Proteasome subunit alpha type 7 (Proteasome subunit alpha 4	DV567012	PSMA7		0.978797	0.566416	0.573227	0.710203	0.376719	0.456193
PfBAX-o4	Zinc finger 234	AJ409362	ZNF234		0.65321	0.767992	0.745035	0.639407	0.431318	0.423952
PfIL243H05	Coiled-coil domain containing 86	DV567389	CCDC86		0.426753	0.759101	0.729052	0.562775	0.464348	0.699941
PfIL243H02	Transmembrane protein 1 isoform 7	EC378410	TMEM1		0.540357	0.434966	0.732805	0.445963	0.827124	0.652191
Contig357	Cystathionine-beta-synthase	DV568809	CBS		0.883469	0.841409	0.704806	0.296119	0.570469	0.336538
PfIL308C03	Annexin A11b	DV569996	ANXA11		0.52032	0.432231	0.978682	0.456901	0.580363	0.656495
PfCF1H9	Density-regulated protein; smooth muscle cell associated protein-3	AJ605288	DENR		0.376435	0.610327	0.658994	0.262672	1.12621	0.579
Contig372	Cathepsin	DV567454	CTSL2		0.722946	0.517501	0.443507	0.380686	0.712314	0.835372
PfIL294D10	ADP-ribosylation factor 5	DV569467	ARF5		0.380067	0.595621	0.545532	0.543817	0.707004	0.835105
Contig735	Cytochrome c oxidase subunit IV isoform 1, mitochondrial	DV569174	COX4I1		0.439369	0.520912	0.776214	0.467791	0.618198	0.781171
Contig338	Hepcidin precursor	DV566288	HAMP		0.515659	0.306505	0.890663	0.615395	0.750131	0.487151
Contig417	Ferritin H-1	AJ508543	FTH1		0.948189	0.549506	0.621241	0.726034	0.299214	0.420835
PfIL289C07	Pescadillo	DV569251	PES1		0.630555	0.60746	0.725501	0.393456	0.423475	0.777196
Contig414	Ferritin, middle subunit (Ferritin M)	DV565840	FTH1		0.85707	0.56384	0.661622	0.595787	0.329229	0.525382
PfKRAS-g1	Ki-ras	Y17187	KRAS		0.494179	0.469173	0.579844	0.451313	0.815734	0.718478
PfIL257A11	Siah-interacting protein (Sip-prov)	DV567982	CACYBP		0.496979	0.557902	0.504341	0.461173	0.70824	0.789194
Contig495	Calcium binding protein, glucose regulated protein GRP170 precursor	AJ605284	HYOU1		0.599344	0.383988	0.767343	0.507953	0.801579	0.453606
PfIL297E02	Ubiquitin-conjugating enzyme E2-18 kDa UbcH7	DV569572	UBE2L3		0.433333	0.474755	0.752323	0.377772	0.687271	0.781409
PfIL009H04	Chaperonin subunit 7	DV565558	CCT7		0.351783	0.524531	0.785328	0.544428	0.761334	0.525172
PfIL314C11	T-complex polypeptide 1	DV570216	TCP1		0.434177	0.610264	0.729513	0.659275	0.481369	0.571427
PfIL280A09	Phosphoribosyl pyrophosphate amidotransferase proprotein variant	EC378976	PPAT		0.417158	0.677007	0.627993	0.617978	0.414312	0.640729
PfIL267F12	Voltage dependent ion channel 2	EC378762	VDAC2		0.389277	0.532703	0.61449	0.560405	0.72557	0.57182
PfIL211F10	Importin 9	EC377885	IPO9		0.402796	0.503261	0.683552	0.724632	0.427423	0.610433
PfBR2E8	Organic anion transporting polypeptide 1b4 (cDNA clone pfbaxo4)	AJ508747	SLCO1C1		0.516449	0.776512	0.654629	0.715693	0.380425	0.268375
PfIL310D04	Transcobalamin I precursor	DV570065	TCN2		0.648434	0.607392	0.443083	0.618693	0.383504	0.5873
PfIL233F02	Centromere/kinetochore protein zw10 homolog	DV566948	ZW10		0.56673	0.536235	0.80855	0.367669	0.589008	0.418612
PfIL232G03	Nucleophosmin 1	DV566912	NPM1		0.419516	0.561375	0.768807	0.298718	0.591009	0.607872
PfIL252A10	Chaperonin containing TCP-1 delta	DV567757	CCT4		0.382733	0.558667	0.602556	0.582244	0.512803	0.604534
Contig310	Non-histone chromosome protein 2-like 1	DV566614	NHP2L1		0.440269	0.619791	0.731068	0.379247	0.549016	0.517256
PfIL237A07	Chaperonin containing T-complex polypeptide 1, epsilon subunit	DV567095	CCT5		0.279359	0.481994	0.704574	0.460991	0.660661	0.590024
PfCF1D2	Eukaryotic translation initiation factor 4 gamma 2	AJ580011	EIF4G2		0.586603	0.378771	0.800264	0.283805	0.560455	0.564643
PfIL247F02	Developmentally regulated GTP binding protein 1	DV567540	DRG1		0.410911	0.708385	0.678266	0.386181	0.476915	0.506277
Contig465	Cytochrome C	AJ605133	CYCS		0.529504	0.440094	0.743278	0.402142	0.599454	0.446728
PfIL294H06	Heat shock 70 kDa protein 4	DV569489	HSPA4		0.362064	0.518094	0.600515	0.404412	0.737921	0.512699
PfIL301E05	PDGFA associated protein 1 ~ (Lep)	DV569725	PDAP1		0.371158	0.498528	0.64463	0.354361	0.732424	0.524685
PfIL246G11	Bystin-like	DV567507	BYSL		0.453152	0.476381	0.470198	0.634987	0.374742	0.683541
PfIL288A03	Translocase of inner mitochondrial membrane 23 homolog	DV569200	TIMM23		0.455226	0.555108	0.704009	0.295522	0.503853	0.579234
PfIL013A10	Transmembrane 4 superfamily member protein	DV565635	TM4SF5		0.427906	0.374527	0.562334	0.514539	0.528734	0.664437
PfIL283F12	Nucleolar complex protein 2 homolog	DV569330	NOC2L		0.362608	0.526204	0.659615	0.493821	0.401469	0.562242
PfIL300G11	Programmed cell death 6	DV569698	PDCD6		0.467574	0.393251	0.438296	0.504689	0.465145	0.671353
PfIL302B11	Transmembrane 4 superfamily member protein	DV569755	TM4SF1		0.394713	0.419476	0.545505	0.462969	0.460968	0.650173
PfIL233F03	Yellowtail growth hormone like protein-1	DV566949	HIGD1A		0.541447	0.326997	0.739475	0.360469	0.50386	0.42578
PfIL227G06	Neurofilament, heavy polypeptide 200kDa	DV566720	NEFH		0.386355	0.638791	0.76096	0.353529	0.36476	0.385046
Contig220	Apolipoprotein A-IV	DV565619	APOA4		0.477619	0.581118	0.509885	0.550463	0.329858	0.407701
Contig413	MASP protease / haptoglobin	DV566657	HP		0.65364	0.399258	0.494475	0.368278	0.386536	0.543555
PfIL207H11	LMBR1 domain containing 2	DV566085	LMBRD2		0.527286	0.483935	0.416515	0.371846	0.322454	0.671272
PfIL266E11	Mitochondrial citrate synthase precursor	DV568416	CS		0.316005	0.395959	0.481435	0.350997	0.646717	0.487613
Contig622	Protein arginine N-methyltransferase 1	DV565357	PRMT1		0.365683	0.377628	0.548729	0.22643	0.582109	0.557
PfIL208F07	Proteoglycan 4	DV566114	PRG4		0.486096	0.377604	0.50753	0.406438	0.397989	0.465613
Contig425	Swiprosin 1	AJ580740	EFHD2		0.365709	0.451679	0.395642	0.310774	0.595484	0.501181
Contig647	Angiotensinogen precursor	DV565437	AGT		0.509583	0.379705	0.500877	0.232694	0.367161	0.615788
PfIL223G10	Leucine-rich alpha-2-glycoprotein 1	DV566570	LRG1		0.437493	0.321819	0.46968	0.236269	0.431557	0.699027
PfIL227G02	Apolipoprotein E	DV566718	APOA4		0.391185	0.635324	0.445353	0.449713	0.292079	0.379915
PfIL241D10	Arginase, type I; A-I	DV567289	ARG2		0.477502	0.374255	0.516486	0.394196	0.358363	0.343296
PfHEM2-l23	Transglutaminase	AJ508541	TGM2		0.40625	0.428192	0.403565	0.428748	0.298528	0.342581
Contig335	Fibrillarin	DV566016	FBL		0.367735	0.493971	0.499515	0.236536	0.252025	0.384252
PfIL238C10	Hypothetical protein zgc:77713, similar to Hs C4orf34	DV567152	C4ORF34		0.270426	0.221738	0.215296	0.218757	0.192964	0.384867
