# Supplementary material for: Towards a System Level Understanding of Non-Model Organisms Sampled from the Environment: A Network Biology Approach
Source: PLoS Comput Biol. 2011 Aug 25;7(8):e1002126. doi: 10.1371/journal.pcbi.1002126 (PMC3161900; doi:10.1371/journal.pcbi.1002126)
Supplement: Table S2 — Correlations of omic data with other variables. Correlations between gene and metabolite expression and chemistry data; comparisons of gene and metabolite expression with presence or absence of liver pathologies; comparisons of gene and metabolite expression with metallothionein quartile. Best viewed in MS-Excel. (XLSX) [file pcbi.1002126.s005.xlsx]

## Sheet: Sheet1
Table S2
Associations between transcripts, metabolites and other measured parameters
Identified transcripts and metabolites are shown, the total number of transcripts (t) and metabolite peaks (m), including unidentifed molecules, are shown in brackets
Genbank shows representative accession number for each gene, symbol shows HUGO symbol of human ortholog for genes, PubChem ID for metabolites
Sediment Chemistry Correlations						Fish Liver Chemistry Correlations						T-tests by Histopathology						T-test by Biomarker
Pearson Correlations (+ve) >0.8 and Significant by ANOVA FDR<0.05 between sites						Pearson Correlations (+ve) >0.8 and Significant by ANOVA FDR<0.05 between sites						T-tests FDR<0.05 for fish with and without these pathologies						T-tests FDR<0.05 between fish from the top and bottom quartiles for the protein biomarker
As (mg/kg) Sediment (7t, 2m)						Fish Liver PCBs Sum7 (52 t, 111m)						Eosinophillic FCA (4t)						MT quartile (152t, 82m)
ID	Common Name	Genbank	Symbol	Correlation		ID	Common Name	Genbank	Symbol	Correlation		ID	Common Name	Genbank	Symbol	FDR		ID	Common Name	Genbank	Symbol	FDR
PfBR1A5	Cytochrome P450, CYP2J2	AJ580513	CYP2J2	0.9		PfIL288E08	Alpha-type globin	EC379099	HBZ	0.975		PfIL226G02	Carboxypeptidase N, polypeptide 1, 50kD precursor	DV566682	CPN1	0.0165		PfIL216B11	Isocitrate dehydrogenase 2 (NADP+), mitochondrial	DV566345	IDH2	3.63e-05
PfIL305F02	CCAAT/Enhancer binding protein epsilon	DV569902	CEBPE	0.867		2.437	Glutamine		738	0.961		PfIL315E01	B-lymphocyte activation marker BLAST-1 precursor	DV570248	CD58	0.0267		3.302	Maltose/taurine		na	3.63e-05
PfCF2A2	Early growth response 1	AM041906	EGR1	0.828		PfIL313A09	Lymphocyte antigen 6 complex, locus D	DV570141	LY6D	0.957		PfIL254G11	Alcohol dehydrogenase class III	DV567880	ADH5	0.0467		PfIL209A08	ATP binding protein associated with cell differentiation	DV566132	TXNDC9	3.86e-05
						PfIL201B04	Coagulation factor X	DV565785	F10	0.933		Contig1049	Chymotrypsinogen 2	DV565968	CTRB2	0.0467		PfIL003B10	Lectin, mannose-binding, 1	DV565350	LMAN1	4.26e-05
						PfIL217C10	Aldo-keto reductase family 1, member A1 (aldehyde reductase)	EC377982	AKR1A1	0.929								PfIL273D04	Proteasome (Prosome, macropain) subunit, beta type, 1	DV568672	PSMB1	7.84e-05
Cd (mg/kg) Sediment (6t, 8m)						3.202	Choline		305	0.926		Fibrillar Inclusions (5t, 2m)						PfCF1H9	Density-regulated protein; smooth muscle cell associated protein-3	AJ605288	DENR	9.04e-05
ID	Common Name	Genbank	Symbol	Correlation		PfIL305E06	Similar to TIM21-like protein	DV569897	C18ORF55	0.921		ID	Common Name	Genbank	Symbol	FDR		PfIL209A06	Asparaginyl-tRNA synthetase	DV566130	NARS	9.04e-05
PfIL243E01	Solute carrier family 1 member 6	DV567375	SLC1A6	0.823		PfIL221G07	ATPase inhibitor precursor	DV566492	ATPIF1	0.918		PfIL241D10	Arginase, type I; A-I	DV567289	ARG2	0.02		Contig201	Protein disulfide isomerase related protein	DV569417	PDIA4	9.04e-05
Contig504	CYP1A Cytochrome P450 1A	AJ132353	CYP1A1	0.81		PfIL217E04	Hemoglobin alpha-B chain	DV566378	HBZ	0.909		PfCF1D2	Eukaryotic translation initiation factor 4 gamma 2	AJ580011	EIF4G2	0.02		PfIL254H09	Transmembrane trafficking protein TMP21	DV567887	TMED10	9.04e-05
PfIL020E01	Cytochrome P450 2K5	DV565685	CYP2J2	0.809		Contig955	Peripheral-type benzodiazepine receptor	DV565952	TSPO	0.909		PfIL294H06	Heat shock 70kDa protein 4	DV569489	HSPA4	0.02		3.307	Maltose/taurine		na	0.000163
PfIL201C02	Prothrombin	DV565789	F2	0.804		Contig433	Hemoglobin beta-A chain	DV565345	HBE1	0.908		PfCF1H12	Thioredoxin-like 1	ay310335	TXNL1	0.02		PfIL256D11	Selenide water dikinase 2	DV567956	SEPHS2	0.000163
						PfIL312H02	cDNA clone 1315455 NCCCWA 02RT similar to Hs C1orf60	DV570134	INTS3	0.906								3.297	Taurine		1123	0.000195
						2.482	Glutamine		738	0.903		Glugea sp. (29t, 3m)						PfIL230G07	SEC22, vesicle trafficking protein-like 1B	DV566831	SEC22B	0.000206
Cr (mg/kg) Sediment (4t)						Contig543	Hemoglobin beta A chain	DV565314	HBE1	0.897		ID	Common Name	Genbank	Symbol	FDR		2.267	Valine		1182	0.000309
ID	Common Name	Genbank	Symbol	Correlation		PfIL256G08	Arginase, type I; A-I	DV567971	ARG1	0.895		PfIL222D01	Transmembrane protein 66	DV566514	TMEM66	3.63e-06		3.202	Choline		305	0.000309
PfIL003E05	Solute carrier family 6 member 8 (SLC6A8)	EC377565	SLC6A8	0.834		PfIL009F04	Cyclin G1	DV565544	CCNG1	0.894		Contig1012	Cholesteryl ester transfer protein	DV565910	CETP	2.82e-05		PfIL278C07	Proteasome (prosome, macropain) subunit, alpha type, 6	DV568871	PSMA6	0.000375
						PfBF1C11	Inter-alpha-trypsin inhibitor heavy chain H3 precursor.	AJ605135	ITIH3	0.887		PfIL283F02	Rag C (Ras-related GTP binding C)	DV569328	RRAGC	2.82e-05		Contig706	F1F0-type ATP synthase subunit g	DV565486	ATP5L	0.000394
						PfIL234F05	Ceruloplasmin	DV566996	CP	0.885		2.437	Glutamine		738	0.00221		PfIL009F04	Cyclin G1	DV565544	CCNG1	0.000471
Cu (mg/kg) Sediment (7t 4m)						1.327	Lactate/threonine		na	0.885		PfIL234A08	LSM12 homolog	DV566972	LSM12	0.00443		Contig298	Alpha tubulin	DV566165	TUBA4A	0.000556
ID	Common Name	Genbank	Symbol	Correlation		PfIL226G11	Tryptophan 2,3-dioxygenase	DV566685	TDO2	0.882		PfIL268G08	Centrin	DV568506	CETN2	0.0087		PfIL288H10	Histidyl-tRNA synthetase	DV569238	HARS	0.000578
PfIL264G11	Lamin B receptor; ichthyosis	DV568349	LBR	0.938		Contig620	Retinol binding protein II, Cellular (CRBP-II)	DV565325	RBP2	0.876		PfIL001E01	Cytochrome P450 24A1	DV565451	CYP24A1	0.0087		PfIL254G11	Alcohol dehydrogenase class III	DV567880	ADH5	0.000581
Contig504	CYP1A Cytochrome P450 1A	AJ132353	CYP1A1	0.922		PfIL011H12	Complement factor B/C2-B	DV565599	CFB	0.875		PfIL278C09	Programmed cell death 4	DV568872	PDCD4	0.0114		Contig291	ER-resident chaperone calreticulin	DV565702	CALR	0.000581
PfIL243E01	Solute carrier family 1 member 6	DV567375	SLC1A6	0.855		PfIL218F05	P18 splicing regulatory protein	EC378008	SFRS12IP1	0.873		PfIL277E08	Megalin	DV568836	LRP2	0.0166		PfIL249H04	V-ATPase A subunit 1	DV567648	ATP6V1A	0.000626
						Contig813	Annexin A2	DV565849	ANXA2	0.863		Contig37	cDNA clone WB9-16:similar to Coturnix bZIP transcription factor	AM041905	C8ORF4	0.0181		PfIL235H07	Thioredoxin-like 1	DV567052	TXNL1	0.000626
						Contig284	Eukaryotic translation initiation factor 4A	DV567731	EIF4A2	0.86		PfIL247B06	Secernin 3	DV567523	SCRN3	0.0224		2.932	N,N-dimethylglycine		673	0.000934
Hg (mg/kg) Sediment (33t, 19m)						PfIL254F12	Microsomal glutathione S-transferase 1	DV567874	MGST1	0.852		PfBR1F6	Eukaryotic translation initiation factor 4E binding protein 1	AJ578020	EIF4EBP1	0.0302		Contig6	SPC18 protein, signal peptidase complex (18kD)	DV565884	SEC11A	0.000954
ID	Common Name	Genbank	Symbol	Correlation		PfIL278G09	Liver-specific uridine phosphorylase	DV568896	UPP2	0.851		PfIL305F11	Survival motor neuron	DV569905	SMN2	0.0302		PfIL237C04	p24 delta1 putative cargo receptor	DV567105	TMED10	0.000954
Contig284	Eukaryotic translation initiation factor 4A	DV567731	EIF4A2	0.984		Contig456	MAP kinase-interacting serine/threonine kinase 2	DV567339	MKNK2	0.847		PfIL205F11	Derlin-2 (Degradation in endoplasmic reticulum protein 2)	DV565997	DERL2	0.0319		PfIL276F07	Ubiquitin carboxyl-terminal hydrolase isozyme L5	DV568796	UCHL5	0.00128
PfIL009F04	Cyclin G1	DV565544	CCNG1	0.968		PfIL268B07	60S acidic ribosomal protein P0 (L10E)	DV568482	RPLP0	0.839		PfIL013B12	Dynein 2 light intermediate chain	DV565643	DYNC2LI1	0.0319		PfIL258H08	Proteasome alpha 1 subunit isoform 2	DV568071	PSMA1	0.00139
PfIL313A09	Lymphocyte antigen 6 complex, locus D	DV570141	LY6D	0.957		1.322	Lactate/threonine		na	0.83		PfIL213F04	Ornithine aminotransferase	EC377917	OAT	0.0345		PfIL237A07	CCT (chaperonin containing T-complex polypeptide 1) epsilon subunit	DV567095	CCT5	0.00191
PfIL248F11	Cytochrome P450 7B1 (Oxysterol 7-alpha-hydroxylase) CYP7B1	EC378489	CYP7B1	0.953		7.197	Tyrosine		6057	0.829		4.117	Lactate		612	0.0482		PfIL285G09	DEAD (ASP-GLU-ALA-ASP)box polypeptide 6	EC379057	DDX6	0.00191
PfIL240F09	DEAD (ASP-GLU-ALA-ASP) box 17	DV567245	DDX17	0.948		3.577	Glycine		750	0.829		PfIL256F09	Adaptor-related protein complex 3, sigma 1 subunit	DV567964	AP3S1	0.0483		4.072	Choline		305	0.00194
Contig814	Retinol dehydrogenase type I	DV565887	RDH16	0.935		Contig1015	Cytidine deaminase	DV565397	CDA	0.811								Contig620	Retinol binding protein II, Cellular (CRBP-II)	DV565325	RBP2	0.00206
PfIL226G11	Tryptophan 2,3-dioxygenase	DV566685	TDO2	0.922		6.902	Tyrosine		6057	0.806								PfIL243A10	Proteasome (Prosome, macropain) subunit, beta type, 5	DV567359	PSMB5	0.00231
Contig256	Mibp beta 1 integrin binding protein 2	DV567021	ITGB1BP3	0.908								Intersex (123t,17m)						PfIL236G06	Prostaglandin E synthase (cytosolic)	DV567082	PTGES3	0.00241
PfIL288E08	Alpha-type globin	EC379099	HBZ	0.893								ID	Common Name	Genbank	Symbol	FDR		PfIL226E10	Proteasome (Prosome, macropain) subunit, beta type, 5	DV566673	PSMB5	0.00245
PfIL234G04	Cross-immune reaction antigen PCIA1	EC378277	DDA1	0.875		Fish Liver Cd (mg/kg) (4t, 8m)						PfIL273E10	Mitochondrial ribosomal protein L52	EC378844	MRPL52	1.47e-10		PfIL280B08	Derlin-2 (Degradation in endoplasmic reticulum protein 2)	DV568954	DERL2	0.00246
PfIL244E12	Insulin-like growth factor IA precursor (IGF-IA)	DV567425	IGF1	0.864		ID	Common Name	Genbank	Symbol	Correlation		PfIL300H06	Proteasome subunit beta 7	DV569701	PSMB7	6.63e-09		PfIL008H10	Peptidylprolyl isomerase F	DV565866	PPIF	0.00284
PfIL293H03	Arrestin domain containing 3	DV569448	ARRDC3	0.858		Contig473	C-type lectin 1	DV568963	NCAN	0.855		PfIL262G04	Ubiquitin specific protease 9	EC378695	USP9X	3.62e-08		PfIL255E12	Heat shock protein gp96	DV567919	HSP90B1	0.00285
PfIL003E05	Solute carrier family 6 member 8 (SLC6A8)	EC377565	SLC6A8	0.858		PfBR2E8	Organic anion transporting polypeptide 1b4	AJ508747	SLCO1C1	0.806		PfIL202H02	Chaperonin containing TCP-1 delta	EC377743	CCT4	4.4e-08		PfIL235A07	Proteasome subunit alpha type 7 (Proteasome subunit alpha 4	DV567012	PSMA7	0.00291
PfIL278G09	Liver-specific uridine phosphorylase	DV568896	UPP2	0.853								PfIL209D02	Splicing factor, arginine/serine-rich 3	EC377842	SFRS3	9.75e-08		PfIL235C10	Formiminotransferase cyclodeaminase	DV567027	FTCD	0.00314
PfIL221G07	ATPase inhibitor precursor	DV566492	ATPIF1	0.852								PfIL002F10	Small nuclear ribonucleoprotein polypeptide A	EC377549	SNRPA	9.75e-08		PfIL318H11	60S ribosomal protein L10	DV570392	RPL10	0.00319
PfIL234F05	Ceruloplasmin	DV566996	CP	0.849		Fish Liver Pb (mg/kg) (30t, 18m)						Contig738	High choriolytic enzyme 1 precursor	DV565583	ASTL	4.25e-07		PfIL204D12	Selenoprotein S	DV565953	SELS	0.00349
PfIL278F06	Calcium binding and coiled-coil domain 2	DV568889	CALCOCO2	0.842		ID	Common Name	Genbank	Symbol	Correlation		PfIL209A06	Asparaginyl-tRNA synthetase	DV566130	NARS	5.52e-07		Contig414	Ferritin, middle subunit (Ferritin M)	DV565840	FTH1	0.00353
Contig504	CYP1A Cytochrome P450 1A	AJ132353	CYP1A1	0.823		PfH28-1b	60S Ribosomal protein L10a	AJ606078	RPL10A	0.972		PfIL277E08	Megalin	DV568836	LRP2	6.81e-07		2.937	N,N-dimethylglycine		673	0.00358
2.437	Glutamine		738	0.818		PfMX-l2b	Interferon inducible Mx	AJ606083	MX1	0.955		PfIL253B10	Copper/zinc superoxide dismutase	DV567808	SOD1	6.85e-07		PfIL009H04	Chaperonin subunit 7	DV565558	CCT7	0.00358
PfIL243H10	Tumour protein P53 inducible nuclear protein 2	DV567392	TP53INP2	0.813		PfIL274E11	Ubiquitin-like protein	DV568723	UBC	0.933		PfIL275E06	Nipsnap homolog 3A	DV568752	NIPSNAP3A	7.08e-07		Contig564	Similar to interleukin 25	DV566068	C19ORF10	0.00377
PfIL218F05	P18 splicing regulatory protein	EC378008	SFRS12IP1	0.811		PfIL284H08	Major histocompatibility class I receptor	DV569075	MR1	0.921		PfIL232B08	Neutral amino acid transporter	DV566885	SLC1A4	7.08e-07		PfIL241H10	Metaxin 2	EC378382	MTX2	0.004
PfIL292B11	TAR DNA-binding protein 43 (TDP-43).	EC379162	TARDBP	0.803		PfIL299G03	Abhydrolase domain containing 6	DV569653	ABHD6	0.917		Contig844	Cytochrome c oxidase subunit IV isoform 2, mitochondrial precursor	DV566301	COX4I1	8.47e-07		PfIL272D07	Mediator of RNA polymerase II transcription, subunit 10 homolog	EC378828	MED10	0.00469
PfIL312A09	Coagulation factor V precursor	EC379485	F5	0.802		PfIL231G07	Zinc finger protein 706	EC378229	ZNF706	0.915		PfBR2C3	Cathepsin S preproprotein	AJ605137	CTSS	1.16e-06		3.287	Taurine		1123	0.00528
						Contig774	MHC II invariant chain	AJ508542	CD74	0.905		4.122	Lactate		612	2e-06		PfIL231G07	Zinc finger protein 706	EC378229	ZNF706	0.00528
						PfIL277D04	Chemokine (C-X-C motif) ligand 14	EC378928	CCL14	0.894		PfIL206E06	SEC61 alpha 2 subunit	DV566029	SEC61A2	3.19e-06		Contig423	Calreticulin	AJ543371	CALR	0.00564
Ni (mg/kg) Sediment (7t, 1m)						PfIL288F06	Prostate stem cell antigen precursor	DV569225	LOC390940	0.891		PfIL012C12	S100-like calcium binding protein A1	DV565613	S100A1	5.79e-06		PfIL228G09	Cathepsin S cysteine protease	EC378174	CTSS	0.00564
ID	Common Name	Genbank	Symbol	Correlation		PfIL228G09	Cathepsin S cysteine protease	EC378174	CTSS	0.879		PfIL238F06	HSPC049 protein	DV567170	WDR91	7.77e-06		PfIL292B10	26S protease regulatory subunit S10B	DV569389	PSMC6	0.00574
PfIL012B09	Tetraspanin 3	EC377643	TSPAN3	0.805		2.467	Glutamine		738	0.875		PfIL279C03	Diablo homolog	DV568917	DIABLO	8.44e-06		PfIL259D04	Signal peptidase complex subunit 3 homolog	EC378645	SPCS3	0.0066
						PfIL212C11	Beta-hexosaminidase alpha chain precursor	DV566228	HEXB	0.874		PfIL294G11	Leukotriene B4 12-hydroxydehydrogenase	DV569485	LTB4DH	1.03e-05		Contig714	Proteasome 26S ATPase subunit 5, MSUG1	DV568919	PSMC5	0.00688
						3.467	Glucose		5793	0.87		PfIL245C07	Integrin alpha5	EC378437	ITGA5	1.04e-05		PfIL244H12	Solute carrier family 39 (zinc transporter)	EC378429	SLC39A9	0.00721
Pb (mg/kg) Sediment (7t, 23m)						Contig909	Putative ISG12 protein (isg12 gene)	DV565511	FAM14A	0.845		PfIL294B01	Deleted in azoospermia-associated protein 2	DV569455	DAZAP2	1.82e-05		PfTUB-o4	Alpha-tubulin	AJ291985	TUBA1A	0.00721
ID	Common Name	Genbank	Symbol	Correlation		3.302	Maltose/taurine		na	0.819		PfIL278C09	Programmed cell death 4	DV568872	PDCD4	2.32e-05		PfIL310E09	FK506-binding protein 2 precursor	EC379456	FKBP2	0.00726
Contig366	Pentraxin	DV565701	NPTX1	0.944		PfIL226G02	Carboxypeptidase N, polypeptide 1, 50kD precursor	DV566682	CPN1	0.814		Contig335	Fibrillarin	DV566016	FBL	2.56e-05		PfG78-g1	GRP-78 (BiP)	AJ305218	HSPA5	0.00735
PfIL243E01	Solute carrier family 1 member 6	DV567375	SLC1A6	0.922		3.432	Taurine (glucose overlap)		na	0.812		Contig1041	Cytochrome c oxidase subunit VIIb precursor	EC379030	COX7B	3.32e-05		PfIL267E07	Solute carrier family 25 (carnitine/acylcarnitine translocase), member 20	EC378759	SLC25A20	0.00735
PfIL275G08	Biliverdin reductase A	DV568765	BLVRA	0.858		2.462	Glutamine		738	0.801		PfIL267A02	Macrophage asialoglycoprotein-binding protein 1	DV568437	CLEC10A	3.35e-05		PfIL272B10	Phospholipid hydroperoxide glutathione peroxidase B	DV569037	GPX4	0.00817
Contig889	Cofilin 2	EC377585	CFL2	0.854		Contig847	Coiled-coil-helix-coiled-coil-helix domain containing 3	DV568929	CHCHD3	0.801		PfIL318D11	Coiled-coil domain containing 23	DV570373	CCDC23	4.02e-05		PfIL301E05	PDGFA associated protein 1	DV569725	PDAP1	0.00817
PfIL264G11	Lamin B receptor; ichthyosis	DV568349	LBR	0.801								PfIL267E07	Solute carrier family 25 (carnitine/acylcarnitine translocase), member 20	EC378759	SLC25A20	4.37e-05		PfIL285C08	Phosphoethanolamine N-methyltransferase	EC379053	C9ORF32	0.00832
												PfIL265C09	Dolichol-phosphate (beta-D) mannosyltransferase 2	DV568369	DPM2	5.17e-05		PfIL214H11	Synaptotagmin binding, cytoplasmic RNA interacting protein (Syncrip)	DV566311	SYNCRIP	0.00832
												PfIL231C07	Heat shock cognate 71 kDa protein	DV566849	HSPA8	7.05e-05		PfIL294H06	Heat shock 70 kDa protein 4	DV569489	HSPA4	0.00835
Zn (mg/kg) Sediment (11t, 14m)												PfIL217G02	Chemokine (C-C motif) ligand 14	EC377992	CCL14	8.61e-05		Contig637	B-cell receptor-associated protein BAP37	DV567622	PHB2	0.00918
ID	Common Name	Genbank	Symbol	Correlation								PfIL305E06	Similar to TIM21-like protein	DV569897	C18ORF55	8.79e-05		PfIL261D04	Beta-3-galactosyltransferase	DV568198	B3GNT2	0.0101
Contig504	CYP1A Cytochrome P450 1A	AJ132353	CYP1A1	0.86								PfIL206D01	Syntaxin 5a	DV566022	STX5	0.000131		PfIL217G02	Chemokine (C-C motif) ligand 14	EC377992	CCL14	0.0101
PfIL243E01	Solute carrier family 1 member 6	DV567375	SLC1A6	0.848								PfIL240E04	HECT domain and RLD 5	DV567235	HERC5	0.00014		PfCF2B2	Eukaryotic translation initiation factor 4E member 3	AJ605127	EIF4E3	0.0101
PfIL294B01	Deleted in azoospermia-associated protein 2	DV569455	DAZAP2	0.843								Pa005	Glucose transporter type 2	na	SLC2A2	0.000195		PfIL216H09	Clathrin, heavy polypeptide (Hc)	DV566358	CLTC	0.0102
PfIL227A02	Ras-GTPase activating protein SH3 domain-binding protein 2	DV566688	GIMAP4	0.835								PfCB5-l21	Dihydropyrimidine dehydrogenase	AJ508535	DPYD	0.000207		PfIL273H09	Hsc70-interacting protein (Hip)	DV568691	ST13	0.0108
Contig366	Pentraxin	DV565701	NPTX1	0.83								PfIL314C11	T-complex polypeptide 1	DV570216	TCP1	0.000341		PfSUL-l2b	Homeobox prox 1	AJ606081	C14ORF166	0.0119
PfIL254F12	Microsomal glutathione S-transferase 1	DV567874	MGST1	0.807								PfIL223D12	Kynureninase (L-kynurenine hydrolase)	EC378088	KYNU	0.000363		PfIL249H12	Sorting nexin-12	DV567651	SNX12	0.012
												PfIL224F02	ZPAX	DV566602	ZP2	0.000384		PfIL205C04	Serine incorporator 1	DV565980	SERINC1	0.0126
												PfIL318D07	Vitamin K-dependent gamma-glutamyl carboxylase	DV570371	GGCX	0.000395		Contig695	DC2 protein	DV565601	DC2	0.0127
Sediment Sum of PAHs (6t, 18m)												PfIL223A02	Choriogenin Hminor	DV566533	ZP4	0.000414		PfIL273G12	Prostaglandin E synthase 3, telomerase binding protein, p23	DV568689	PTGES3	0.0127
ID	Common Name	Genbank	Symbol	Correlation								PfSHA1E12	Microsomal glutathione S-transferase 1	AJ543337	MGST1	0.000428		PfIL278G09	Liver-specific uridine phosphorylase	DV568896	UPP2	0.0131
PfIL243E01	Solute carrier family 1 member 6	DV567375	SLC1A6	0.845								PfIL247G04	Xylulokinase homolog	EC378475	XYLB	0.000496		PfIL012B08	Apolipoprotein F	DV565607	APOF	0.0155
PfIL264G11	Lamin B receptor; ichthyosis	DV568349	LBR	0.84								PfIL228G06	Hypothetical protein XP_690801, Hs C19orf24	EC378173	C19ORF24	0.000534		PfIL308H05	Proteasome, 26S, non-ATPase regulatory subunit 6	DV570012	PSMD6	0.0159
Contig504	CYP1A Cytochrome P450 1A	AJ132353	CYP1A1	0.835								Contig531	60S ribosomal protein L13	DV565391	RPL13	0.00065		PfIL298D09	NADH dehydrogenase subunit 2	DV569603	MT-ND2	0.0169
PfIL251G11	Alpha-N-acetylgalactosaminidase	DV567743	GLA	0.823								PfIL272B10	Phospholipid hydroperoxide glutathione peroxidase B	DV569037	GPX4	0.000946		PfCF2C3	Ran protein - member of Ras superfamily, nuclear GTP-ase.	AJ605272	RAN	0.017
PfIL267H12	Selenium binding protein 1	DV568476	SELENBP1	0.821								PfIL318C10	Procollagen-lysine, 2-oxoglutarate 5-dioxygenase 3	DV570365	OGFOD2	0.00124		Contig456	MAP kinase-interacting serine/threonine kinase 2	DV567339	MKNK2	0.0183
3.287	Taurine		1123	0.812								PfIL251E01	UXT protein	DV567724	UXT	0.00175		PfIL212C11	Beta-hexosaminidase alpha chain precursor	DV566228	HEXB	0.0187
												PfCF1C9	Cytchrome C-1	AJ579529	CYC1	0.00196		PfIL246B09	Malate dehydrogenase 2, NAD (mitochondrial)	DV567484	MDH2	0.0187
												PfCR1C7	Transcobalamin	AM041919	TCN2	0.00236		PfIL226G11	Tryptophan 2,3-dioxygenase	DV566685	TDO2	0.0187
Sediment Sum of PCBs ICES 7 (32T, 28m)												PfIL273A07	Transcription factor MafB	DV568652	MAFB	0.0024		PfIL007D09	Mitochondrial ATP synthase c-subunit (P3)	DV565448	ATP5G2	0.0193
ID	Common Name	Genbank	Symbol	Correlation								PfIL246C05	Serine/threonine-protein phosphatase PP1-alpha	EC378450	PPP1CA	0.0024		Contig417	Ferritin H-1	AJ508543	FTH1	0.0202
2.467	Glutamine		738	0.957								PfIL201F09	40S ribosomal protein S27-1	DV565803	RPS27	0.00261		PfIL273F09	Collaborates/cooperates with ARF (alternate reading frame) protein	EC378847	CDKN2AIPNL	0.0209
PfIL288F06	Prostate stem cell antigen precursor	DV569225	LOC390940	0.956								PfBR2B9	Apolipoprotein A1	AJ578025	APOA1	0.00298		PfIL270C09	Peroxisomal short-chain alcohol dehydrogenase	DV568567	DHRS4	0.0225
3.142	Malonate		867	0.917								PfIL221G07	ATPase inhibitor precursor	DV566492	ATPIF1	0.00298		PfIL256G08	Arginase, type I; A-I	DV567971	ARG1	0.0233
Contig1041	Cytochrome c oxidase subunit VIIb precursor	EC379030	COX7B	0.913								PfIL008H03	CDKN1A interacting zinc finger protein 1	DV565865	CIZ1	0.003		PfIL266F02	Proteasome 26S non-ATPase subunit 3	DV568418	PSMD3	0.0233
Contig774	MHC II invariant chain	AJ508542	CD74	0.895								Contig492	c-Fos	AJ508730	FOS	0.00332		PfIL295D10	Solute carrier family 25 member 3	DV569510	SLC25A3	0.0235
PfIL238B10	Ras-related GTP-binding protein ragA	EC378316	RRAGA	0.894								PfIL258G08	CC chemokine	EC378635	CCL8	0.00461		PfIL220G03	Uridine phosphorylase 2	DV566457	UPP2	0.0239
PfIL228G09	Cathepsin S cysteine protease	EC378174	CTSS	0.893								PfIL251D10	Cathepsin	DV567722	CTSL2	0.00663		PfIL266D11	Caspase 10	DV568413	CASP8	0.0243
2.462	Glutamine		738	0.89								PfIL012H01	Inter alpha (globulin) inhibitor H3	DV565630	ITIH3	0.00686		Contig814	Retinol dehydrogenase type I	DV565887	RDH16	0.0243
PfIL251G11	Alpha-N-acetylgalactosaminidase	DV567743	GLA	0.864								PfIL305D06	Protease, serine, 1 (trypsin 1)	DV569891	PRSS1	0.00704		PfIL266E10	Hypoxanthine phosphoribosyltransferase 1	EC378750	HPRT1	0.0246
PfIL264E11	Eukaryotic translation initiation factor 4E binding protein 3	DV568337	EIF4EBP3	0.859								PfIL243A10	Proteasome (Prosome, macropain) subunit, beta type, 5	DV567359	PSMB5	0.00789		PfCR1C4	FK506 binding protein 3, 25kDa	AM041918	FKBP3	0.025
PfIL274E11	Ubiquitin-like protein	DV568723	UBC	0.852								PfIL208F07	Proteoglycan 4	DV566114	PRG4	0.00811		3.222	o-Phosphocholine		1014	0.0258
3.467	Glucose		5793	0.846								PfIL309H02	Acetyl-Coenzyme A acyltransferase 1	EC379447	ACAA1	0.00838		3.282	Taurine		1123	0.0281
Contig685	High choriolytic enzyme 1 precursor	DV567267	ASTL	0.837								PfORN-l2	Ornithine decarboxylase	AJ306293	ODC1	0.00902		Contig752	Liver-expressed antimicrobial peptide 2A	DV565675	LEAP2	0.0281
PfIL237F09	GC-rich promoter binding protein 1-like 1	DV567122	GPBP1L1	0.833								PfPPR-o8	E3-ubiquitin ligase (SMURF1)	AJ310515	SMURF1	0.00961		Contig622	Protein arginine N-methyltransferase 1	DV565357	PRMT1	0.0286
PfIL244A09	DKFZP586J0523 Protein	EC378414	NPDC1	0.826								3.387	Glucose		5793	0.0113		PfIL268A06	Microsomal glutathione S-transferase 3	DV568479	MGST3	0.0315
2.942	N,N-dimethylglycine		673	0.825								PfD25-l1	Membrane progesterone receptor	AJ310425	PGRMC1	0.0113		PfIL254F12	Microsomal glutathione S-transferase 1	DV567874	MGST1	0.0318
PfIL277D04	Chemokine (C-X-C motif) ligand 14	EC378928	CCL14	0.822								PfIL012B09	Tetraspanin 3	EC377643	TSPAN3	0.0148		PfIL265C09	dolichol-phosphate (beta-D) mannosyltransferase 2	DV568369	DPM2	0.0319
PfIL218B11	Membrane protein, palmitoylated 1, 55kDa	DV566391	MPP1	0.819								PfIL301E07	Mitochondrial import inner membrane translocase subunit TIM8 A	DV569726	TIMM8A	0.0152		Contig248	Dehydrogenase/3-ketoacyl-Coenzyme A thiolase	DV566889	HADHB	0.0331
PfIL201F09	40S ribosomal protein S27-1	DV565803	RPS27	0.818								PfIL311F09	Hypothetical protein FLJ22222	EC379479	FLJ22222	0.016		PfIL313A09	Lymphocyte antigen 6 complex, locus D	DV570141	LY6D	0.034
PfIL318D02	Elastase 1	DV570368	ELA1	0.807								PfIL304H03	Microsomal glutathione S-transferase 1	EC379360	MGST1	0.0197		PfIL304D01	GTPase activating protein Rap1-GAP	EC379352	RAP1GAP2	0.034
												PfIL277H02	Ubiquitin-protein ligase RMA1	EC378935	RNF5	0.0197		2.437	Glutamine		738	0.0343
												Contig778	Ubiquitin-like protein SMT3B precursor	DV570076	SUMO2	0.0212		PfIL294C08	Hsp70 binding protein	DV569462	HSPBP1	0.0346
												PfIL050G06	Reverse transcriptase	EC377697	LOC100289563	0.0227		Contig813	Annexin A2	DV565849	ANXA2	0.035
												1.332	Lactate/threonine		lactate/threonine	0.027		PfIL217H04	HSPA (heat shock 70kDa) binding protein, cytoplasmic cochaperone 1	DV566385	HSPBP1	0.0392
												PfIL203B06	La ribonucleoprotein domain family, member 5	DV565897	LARP5	0.031		Contig531	60S ribosomal protein L13	DV565391	RPL13	0.0392
												PfIL223G10	Leucine-rich alpha-2-glycoprotein 1	DV566570	LRG1	0.0333		3.577	Glycine		750	0.0398
												PfIL249D02	Cytochrome c oxidase subunit VIb	EC378498	COX6B1	0.0387		PfIL266E11	Mitochondrial citrate synthase precursor (CS)	DV568416	CS	0.0405
												Contig1042	Mago nashi homolog	EC378709	MAGOH	0.0388		PfIL275E06	Nipsnap homolog 3A	DV568752	NIPSNAP3A	0.0423
												PfIL299D04	Aldose reductase-related protein 2	DV569644	AKR1B10	0.044		3.212	Choline		305	0.0432
												PfIL226F08	Proteasome subunit alpha type 4	DV566680	RBPMS2	0.0498		PfIL234C11	Tubulin, beta 2C	EC378266	TUBB2C	0.0433
																		PfCF1H12	Thioredoxin-like 1	ay310335	TXNL1	0.045
																		PfIL288B09	Death-associated protein kinase 2	EC379094	DAPK2	0.047
												Lipoidosis (182t, 66m)						PfIL227D07	Calmodulin	DV566705	CALM3	0.0481
												ID	Common Name	Genbank	Symbol	FDR		Contig723	Hemoglobin alpha chain	AJ605278	HBZ	0.0481
												PfIL254H03	TRK-fused gene	DV567882	TFG	4.85e-13		PfIL249G10	Carboxypeptidase, vitellogenic-like	DV567646	CPVL	0.0483
												PfIL286D05	N-acetylglucosamin kinase	DV569136	NAGK	6.81e-13		PfIL228G06	Hypothetical protein XP_690801, Hs C19orf24	EC378173	C19ORF24	0.0495
												PfIL284F07	RAB5 interacting protein 2	EC379040	RIN2	5.07e-11
												3.277	Taurine		1123	8.12e-11
												PfIL267F12	Voltage dependent ion channel 2	EC378762	VDAC2	3.59e-10
												PfIL227D01	Actinin, alpha 1	DV566703	ACTN1	7.44e-10
												Contig1060	Trypsin	EC378978	PRSS1	1.74e-09
												Contig467	Deoxyribonuclease I precursor (DNase I)	DV569482	DNASE1	2.89e-09
												PfIL242G10	MLN64 N-terminal domain homolog	DV567352	STARD3NL	8.89e-08
												PfIL273H09	Hsc70-interacting protein (Hip)	DV568691	ST13	1.11e-07
												PfIL243B02	Immunoglobulin D heavy chain	EC378398	LOC100130811	1.04e-06
												PfIL227A04	cDNA clone WB12-20 similar to Hs C17orf37	DV566690	C17ORF37	3.03e-06
												Contig418	Alpha amylase	DV567943	AMY1C	3.09e-06
												PfIL244A11	Coagulation factor VIIc	DV567397	F7	3.68e-06
												Contig919	Chymotrypsinogen 1	AJ543349	CTRL	3.81e-06
												PfIL240E04	HECT domain and RLD 5	DV567235	HERC5	3.81e-06
												4.117	Lactate		612	4.66e-06
												PfIL007A06	Carboxypeptidase B	DV565430	CPB1	7.04e-06
												PfIL238C12	Isocitrate dehydrogenase 1 (NADP+), soluble	EC378318	IDH1	7.17e-06
												PfIL310A07	Telomerase-associated protein 1	EC379450	TEP1	7.21e-06
												PfIL007D09	Mitochondrial ATP synthase c-subunit (P3)	DV565448	ATP5G2	7.46e-06
												PfIL241H10	Metaxin 2	EC378382	MTX2	7.98e-06
												Contig495	Calcium binding protein, glucose regulated protein GRP170 precursor	AJ605284	HYOU1	8.78e-06
												PfIL244H03	Tumor susceptibility gene 101	EC378427	TSG101	9.29e-06
												Contig531	60S ribosomal protein L13	DV565391	RPL13	1.31e-05
												PfIL258B11	Inhibitor of DNA binding 2	DV568036	ID2	1.56e-05
												PfIL203D07	Phosphoserine aminotransferase	DV565911	PSAT1	2.71e-05
												PfIL233H02	Ubiquitin binding protein homolog	DV566962	UBFD1	2.89e-05
												PfIL214H11	Synaptotagmin binding, cytoplasmic RNA interacting protein (Syncrip)	DV566311	SYNCRIP	3.01e-05
												PfIL240C10	Fibrinogen gamma chain precursor	DV567229	FGG	3.35e-05
												PfIL320A01	pin2/trf1-Interacting protein 1	EC379641	PINX1	4.5e-05
												PfIL213G08	Vacuolar protein sorting-associated protein 45	DV566274	VPS45	5.24e-05
												PfIL231A02	Adducin 3 (gamma)	DV566839	ADD3	5.25e-05
												PfIL239C07	Cathepsin	DV567189	CTSL2	5.95e-05
												PfIL264B10	Interferon regulatory factor 2	EC378714	IRF2	6.65e-05
												PfIL012A11	Additional sex combs like 1 protein	DV565603	ASXL1	6.88e-05
												PfIL289E03	Archipelago CG15010-PC, isoform C	EC379113	FBXO16	7.94e-05
												PfIL315E08	Ubiquitin-conjugating enzyme E2 Q2	DV570252	UBE2Q2	7.94e-05
												3.297	Taurine		1123	0.000141
												PfIL294D10	ADP-ribosylation factor 5	DV569467	ARF5	0.000144
												PfIL279B10	Receptor accessory protein 5	EC378962	REEP5	0.000331
												PfIL250A02	Triadin	DV567653	TRDN	0.000338
												Contig706	F1F0-type ATP synthase subunit g	DV565486	ATP5L	0.000346
												PfIL210C09	Fumarylacetoacetate hydrolase	DV566175	FAH	0.000352
												PfG78-g1	GRP-78 (BiP)	AJ305218	HSPA5	0.000387
												PfIL249C07	Nucleoporin 214kDa	DV567616	NUP214	0.000408
												PfIL318E02	Interferon regulatory factor 8	EC379604	IRF8	0.000527
												PfIL301E05	PDGFA associated protein 1	DV569725	PDAP1	0.000539
												PfIL243A11	28S ribosomal protein S12, mitochondrial precursor (S12mt)	DV567360	RPS23	0.00057
												PfIL274A07	17-beta hydroxysteroid dehydrogenase type 12B	DV568696	HSD17B12	0.000618
												PfIL303E02	Diphthine synthase	DV569866	DPH5	0.00137
												PfIL249H12	Sorting nexin-12	DV567651	SNX12	0.00144
												Contig372	Cathepsin	DV567454	CTSL2	0.00173
												PfIL009B06	Gastric cancer antigen Zg14 homolog	EC377617	CTA-126B4.3	0.00188
												PfIL290D01	Centrosome-associated protein 350	EC379129	CEP350	0.0025
												PfH27-l3	Chromosome condensation protein	AJ306230	NCAPG	0.00289
												PfIL226A05	IK cytokine, down-regulator of HLA II	DV566648	IK	0.00292
												Contig850	Intrinsic factor	AJ580757	TCN1	0.00391
												PfIL254G11	Alcohol dehydrogenase class III	DV567880	ADH5	0.00394
												PfIL286A08	Ghiso	EC379061	LYRM5	0.00446
												PfIL006A05	Pyrophosphatase (inorganic) 2	DV565379	PPA2	0.00467
												PfIL238H09	Histone H2B	DV567178	HIST1H2BB	0.00482
												PfIL238E10	Peptidyl-prolyl cis-trans isomerase	DV567164	FKBP15	0.00523
												PfCB5-l21	Dihydropyrimidine dehydrogenase	AJ508535	DPYD	0.00535
												PfIL251D10	Cathepsin	DV567722	CTSL2	0.00605
												Contig778	Ubiquitin-like protein SMT3B precursor	DV570076	SUMO2	0.00618
												Contig852	Complement control protein factor I-B	DV569070	CFI	0.00687
												PfIL205E02	Geminin	DV565989	GMNN	0.00714
												PfIL270C09	Peroxisomal short-chain alcohol dehydrogenase	DV568567	DHRS4	0.00801
												PfIL318G03	Protein phosphatase 1, regulatory (inhibitor) subunit	DV570381	PPP1R1C	0.00801
												PfIL238E11	Arrestin domain containing 3	DV567165	ARRDC3	0.00957
												PfIL317B03	Synaptotagmin binding, cytoplasmic RNA interacting protein	DV570310	SYNCRIP	0.00957
												PfIL246H08	High mobility group AT-hook 2	EC378461	HMGA2	0.00973
												PfIL266E10	Hypoxanthine phosphoribosyltransferase 1	EC378750	HPRT1	0.011
												PfIL317A07	MIP1alpha	EC379585	CCL14	0.0112
												PfIL277B02	Uncharacterized protein FLJ10324	DV568815	RADIL	0.0112
												PfIL246H02	Protein tyrosine phosphatase-like member b	DV567509	PTPLB	0.0113
												PfIL221G07	ATPase inhibitor precursor	DV566492	ATPIF1	0.0119
												2.482	Glutamine		738	0.0129
												PfIL313B03	Peptidyl-prolyl cis-trans isomerase	DV570144	NKTR	0.0149
												PfIL317E01	RAB11 family interacting protein 1 (class I)	DV570325	RAB11FIP1	0.0149
												PfIL207G05	Eukaryotic translation initiation factor 4 gamma 3	EC377815	EIF4G3	0.0161
												PfIL304H11	Down-regulated in metastasis	DV569814	LOC653877	0.0176
												Pp002	3' Untranslated region of GSTA1	x95199	GSTZ1	0.0186
												PfIL012H09	FAD-synthetase (Pp591)	DV565632	FLAD1	0.0195
												Contig891	H2A histone family	DV566822	H2AFZ	0.0199
												PfIL304E08	Hepcidin	DV569797	HAMP	0.0211
												Contig509	NADH Dehydrogenase subunit 1	AJ310717	MT-ND1	0.0217
												PfIL012B08	Apolipoprotein F	DV565607	APOF	0.0236
												2.932	N,N-dimethylglycine		673	0.0266
												PfIL012H08	Inhibitor of differentiation 1C; Id 6-2	EC377660	ID1	0.0268
												PfIL305B12	Taurine transporter	DV569827	SLC6A6	0.0268
												Contig1075	PTD015 protein	EC379124	C11ORF67	0.0287
												Contig864	Phospholipase A2 precursor	DV565680	PLA2G1B	0.0303
												PfIL240C01	ATP synthase, H+ transporting, mitochondrial F0 complex, subunit F6	DV567223	ATP5J	0.0309
												PfIL299H03	Cell division cycle 45-like	EC379283	CDC45L	0.0309
												Contig729	Pancreatic elastase 1	DV565694	ELA2A	0.0314
												PfIL238C02	Proliferating cell nuclear antigen PCNA	DV567148	PCNA	0.0314
												PfIL208F07	Proteoglycan 4	DV566114	PRG4	0.0337
												PfIL230A04	Immunoglobulin superfamily, member 5	EC378197	IGSF5	0.0348
												PfIL317G03	Thyroid hormone receptor interactor 13	DV570336	TRIP13	0.0396
												PfIL313E01	Fizzy-related protein	EC379518	FZR1	0.0398
												PfIL280H03	Splicing factor, arginine/serine-rich 2 (SC-35)	DV568976	SFRS2	0.0398
												PfIL234A08	LSM12 homolog	DV566972	LSM12	0.0424
												PfIL284H05	Transferrin	EC379046	TF	0.0444
												Contig589	Hemoglobin alpha-A chain	DV565340	HBZ	0.0464
												PfIL302B11	Transmembrane 4 superfamily member protein	DV569755	TM4SF1	0.0479
												PfIL264A03	Putative c-Myc-responsive isoform 1, Hs C6orf108	EC378710	C6ORF108	0.0492
												Phospholipoidosis (113t, 48m)
												ID	Common Name	Genbank	Symbol	FDR
												PfIL294C08	Hsp70 binding protein	DV569462	HSPBP1	9.14e-15
												PfBF1C11	Inter-alpha-trypsin inhibitor heavy chain H3 precursor.	AJ605135	ITIH3	2.2e-13
												Pa016	Cytochrome P450 2X	ay225104	CYP2J2	1.3e-12
												PfIL009B06	Gastric cancer antigen Zg14 homolog	EC377617	CTA-126B4.3	3.16e-11
												PfIL259H03	Cullin-3 (CUL-3).	DV568122	CUL3	8.89e-09
												Contig248	Dehydrogenase/3-ketoacyl-Coenzyme A thiolase	DV566889	HADHB	8.89e-09
												PfIL256D11	Selenide water dikinase 2	DV567956	SEPHS2	2.05e-08
												Contig372	Cathepsin	DV567454	CTSL2	4.21e-08
												PfIL228B06	DNAJC8 protein (DnaJ (Hsp40) homolog, subfamily C, member 8	DV566732	DNAJC8	2.88e-07
												3.467	Glucose		5793	6.86e-07
												PfIL002C11	Cytochrome C oxidase subunit VIB polypeptide 1	DV565489	COX6B1	6.86e-07
												PfIL275E06	Nipsnap homolog 3A	DV568752	NIPSNAP3A	7.36e-07
												PfIL273D04	Proteasome (Prosome, macropain) subunit, beta type, 1	DV568672	PSMB1	1.03e-06
												Contig844	Cytochrome c oxidase subunit IV isoform 2, mitochondrial precursor	DV566301	COX4I1	1.56e-06
												PfIL295D10	Solute carrier family 25 member 3	DV569510	SLC25A3	8.6e-06
												PfIL298D09	NADH dehydrogenase subunit 2	DV569603	MT-ND2	2.56e-05
												PfIL207E10	C1R/C1S subunit of Ca2+-dependent complex	DV566070	MASP2	4.68e-05
												PfIL256A08	Rab-like novel Ras family member	DV567941	RAB8B	0.000199
												PfIL251D10	Cathepsin	DV567722	CTSL2	0.000228
												3.307	Maltose/taurine		na	0.000288
												PfIL204B08	Plakophilin 3	DV565942	PKP3	0.000288
												PfIL216H09	Clathrin, heavy polypeptide (Hc)	DV566358	CLTC	0.000483
												PfIL310A08	Calcium binding atopy-related autoantigen 1	DV570050	CBARA1	0.000494
												PfIL302E10	Interleukin 13 receptor, alpha 1	DV569771	IL13RA1	0.000649
												Pp011	PPAR alpha	AJ539467	PPARA	0.000731
												Pa017	Serine protinase inhibitor	cb074846	SERPINB4	0.00111
												PfIL011G06	C-type lectin, superfamily member 14 isoform 1	EC377636	CLEC10A	0.00158
												PfIL001H02	Aldehyde reductase 6	DV565466	MIOX	0.00158
												PfIL247B06	Secernin 3	DV567523	SCRN3	0.00158
												PfIL251E01	UXT protein	DV567724	UXT	0.00163
												PfSHT2A11	Arrestin domain containing 3	AJ543363	ARRDC3	0.00185
												Contig302	NADH dehydrogenase subunit 4	DV567824	MT-ND4	0.00224
												PfIL256G08	Arginase, type I; A-I	DV567971	ARG1	0.00225
												PfIL280B08	Derlin-2 (Degradation in endoplasmic reticulum protein 2)	DV568954	DERL2	0.00227
												PfIL268A06	Microsomal glutathione S-transferase 3	DV568479	MGST3	0.00357
												PfIL258H08	Proteasome alpha 1 subunit isoform 2	DV568071	PSMA1	0.00403
												4.117	Lactate		612	0.00457
												3.297	Taurine		1123	0.00466
												PfIL020B09	Carboxymethylenebutenolidase-like	DV565673	CMBL	0.00466
												PfG153-o71	Glycoprotein 2 (zymogen granule membrane)	AJ409353	GP2	0.00466
												PfIL278F06	Calcium binding and coiled-coil domain 2	DV568889	CALCOCO2	0.00498
												4.077	Choline		305	0.00502
												PfIL252C04	Muc19 precursor	DV567763	MUC2	0.00633
												PfIL205D01	Interleukin-8 variant	DV565984	IL8	0.0077
												Contig648	Carboxypeptidase A1	DV565300	CPA1	0.00791
												PfIL247F02	Developmentally regulated GTP binding protein 1	DV567540	DRG1	0.0134
												PfCF2B11	Fibrinogen alpha chain	AM041909	FGA	0.0134
												PfIL282F07	Ubiquinol-cytochrome C reductase complex 11 kDa protein	DV569002	UQCRH	0.0134
												PfIL222C03	Zinc binding alcohol dehydrogenase, domain containing 1	DV566507	ZADH1	0.0134
												PfCAT-o23	Twist neighbor	AJ508546	TWISTNB	0.0158
												Contig540	60S ribosomal protein L24	DV565577	RPL24	0.016
												PfGST-o1	Glutathione-S-transferase	AJ310428	GSTO1	0.0239
												PfIL230G07	SEC22, vesicle trafficking protein-like 1B	DV566831	SEC22B	0.0276
												PfIL211D01	Aldo-keto reductase family 1, member A1	DV566202	AKR1A1	0.0334
												Contig637	B-cell receptor-associated protein BAP37	DV567622	PHB2	0.0334
												PfIL308H05	Proteasome, 26S, non-ATPase regulatory subunit 6	DV570012	PSMD6	0.0354
												PfIL298E02	Complement control protein factor I-B	EC379258	CFI	0.0389
												PfIL305H05	Nipped-B homolog	DV569910	NIPBL	0.0389
												PfIL270C09	Peroxisomal short-chain alcohol dehydrogenase	DV568567	DHRS4	0.039
												PfIL140G12	Hypothetical protein FLJ36748	DV565773	AFAP1L1	0.042
												Contig1079	Trypsinogen 2 precursor	DV565318	PRSS2	0.0427
												PfBR2E8	Organic anion transporting polypeptide 1b4	AJ508747	SLCO1C1	0.0468
												PfIL316G05	Solute carrier family 25, member 36	DV570297	SLC25A36	0.047
												Contig504	CYP1A Cytochrome P450 1A	AJ132353	CYP1A1	0.0496
												Vacuolated FCA (133t,40m)
												ID	Common Name	Genbank	Symbol	FDR
												PfIL203B12	DAZ-associated protein 2	DV565901	DAZAP2	5.16e-11
												PfIL238B10	Ras-related GTP-binding protein ragA	EC378316	RRAGA	1.61e-09
												Contig1041	Cytochrome c oxidase subunit VIIb precursor	EC379030	COX7B	1.34e-07
												Pa006	IGF-1 precursor	na	IGF1	1.44e-07
												PfIL262D05	Hepatitis B virus X-interacting protein	EC378686	HBXIP	1.89e-07
												PfIL256D07	RNA polymerase I polypeptide D	DV567954	POLR1D	2.86e-07
												PfCAT-o23	Twist neighbor	AJ508546	TWISTNB	4.3e-07
												PfIL298B02	Mitochondrial ribosomal protein L22	EC379255	MRPL22	5.44e-07
												PfIL286E08	Mitogen-activated protein kinase 11	DV569141	MAPK11	5.53e-07
												PfIL285C08	Phosphoethanolamine N-methyltransferase	EC379053	C9ORF32	9.44e-07
												PfIL304E08	Hepcidin	DV569797	HAMP	9.76e-07
												PfIL265C09	Dolichol-phosphate (beta-D) mannosyltransferase 2	DV568369	DPM2	1.03e-06
												PfIL232F01	ATPase family, AAA domain containing 4	DV566905	ATAD4	1.09e-06
												PfIL308C10	Replication factor C (activator 1) 5	DV569999	RFC5	1.31e-06
												PfIL317A07	MIP1alpha	EC379585	CCL14	1.66e-06
												PfIL304D01	GTPase activating protein Rap1-GAP	EC379352	RAP1GAP2	2.12e-06
												PfIL272A09	Protein FAM13A1 isoform 3	EC378823	FAM13A1	2.42e-06
												PfIL256D11	Selenide water dikinase 2	DV567956	SEPHS2	2.42e-06
												PfIL012B08	Apolipoprotein F	DV565607	APOF	2.74e-06
												Pp004	Fetuin A	na	AHSG	3.46e-06
												PfIL241F06	Nucleoplasmin-like protein NO29	DV567299	NPM3	3.91e-06
												PfIL235F09	Elastin microfibril interfacer 1	DV567043	EMILIN1	4.09e-06
												Contig470	Hepcidin-like precursor	DV565348	HAMP	6.86e-06
												Contig955	Peripheral-type benzodiazepine receptor	DV565952	TSPO	7.36e-06
												PfIL008H03	CDKN1A interacting zinc finger protein 1	DV565865	CIZ1	9e-06
												PfIL309H02	Acetyl-Coenzyme A acyltransferase 1	EC379447	ACAA1	9.14e-06
												3.142	Malonate		867	1.11e-05
												PfIL206D01	Syntaxin 5a	DV566022	STX5	1.97e-05
												PfIL291C08	Glutathione S-transferase, theta 3	DV569356	GSTT1	2.07e-05
												PfIL277G12	Archease	DV568849	ZBTB8OS	3.35e-05
												PfIL302E08	CA1 protein	EC379329	ZNF567	3.45e-05
												PfIL224B11	Histone acetyltransferase 1	DV566581	HAT1	3.85e-05
												1.332	Lactate/threonine		na	4.15e-05
												PfIL258A04	COMM domain containing 1	EC378628	COMMD1	5.31e-05
												PfIL295D10	Solute carrier family 25 member 3	DV569510	SLC25A3	8.47e-05
												PfIL278C09	Programmed cell death 4	DV568872	PDCD4	0.000103
												PfIL234A06	Karyopherin alpha 5 (importin alpha 6)	EC378259	KPNA5	0.000125
												PfIL234F05	Ceruloplasmin	DV566996	CP	0.000245
												PfIL299D06	Ferritin, heavy polypeptide 1	DV569645	FTH1	0.00032
												PfIL293B09	AP-3 complex subunit sigma-2	EC379181	AP3S2	0.000349
												PfIL299D01	Klotho	DV569642	KL	0.000357
												PfIL277E08	Megalin	DV568836	LRP2	0.000493
												PfIL264B11	Tripartite motif-containing 35	EC378715	TRIM35	0.000494
												Contig525	UDP-glucuronosyltransferase (UGT3 gene)	AJ291986	UGT1A1	0.000581
												PfIL240G11	Ubiquitin-like 5	EC378361	UBL5	0.000595
												PfIL255G11	Acid phosphatase 5, tartrate resistant	DV567931	ACP5	0.000647
												PfCB5-l1	ETS variant 6 (TEL oncogene)	AJ409365	ETV6	0.000712
												PfIL246G07	Phosphomannomutase 2	EC378459	PMM2	0.000922
												PfIL246F02	Nitrilase homolog 1	DV567498	NIT2	0.00137
												Contig844	Cytochrome c oxidase subunit IV isoform 2, mitochondrial precursor	DV566301	COX4I1	0.00155
												PfIL254G11	Alcohol dehydrogenase class III	DV567880	ADH5	0.00192
												Contig335	Fibrillarin	DV566016	FBL	0.00229
												PfIL244A09	DKFZP586J0523 Protein	EC378414	NPDC1	0.00242
												PfIL226E10	Proteasome (Prosome, macropain) subunit, beta type, 5	DV566673	PSMB5	0.00242
												PfIL223G10	Leucine-rich alpha-2-glycoprotein 1	DV566570	LRG1	0.00248
												PfIL221G07	ATPase inhibitor precursor	DV566492	ATPIF1	0.00282
												PfBR2B9	Apolipoprotein A1	AJ578025	APOA1	0.00289
												PfIL305C07	Hypothetical protein C6orf162	DV569888	C6ORF162	0.00366
												PfIL310A07	Telomerase-associated protein 1	EC379450	TEP1	0.00472
												PfIL205D04	Vacuolar sorting protein 52	EC377774	VPS52	0.00478
												PfIL279B11	KIAA0232	EC378963	KIAA0232	0.00492
												PfKRAS-g1	Ki-ras	y17187	KRAS	0.00609
												PfIL268G08	Centrin	DV568506	CETN2	0.00662
												PfIL278G09	Liver-specific uridine phosphorylase	DV568896	UPP2	0.00769
												PfIL299H04	Acetyl-Coenzyme A acetyltransferase 1 (acetoacetyl Coenzyme A thiolase)	EC379284	ACAT1	0.00962
												PfIL286H02	Replication factor C (Activator 1) 3	DV569151	RFC3	0.0107
												PfIL276E06	Hypothetical protein LOC393152	DV568792	KIAA0196	0.0129
												Contig298	Alpha tubulin	DV566165	TUBA4A	0.0141
												PfIL285G09	DEAD (ASP-GLU-ALA-ASP)box polypeptide 6	EC379057	DDX6	0.0156
												1.337	Lactate/threonine		na	0.017
												PfIL288A03	Translocase of inner mitochondrial membrane 23 homolog	DV569200	TIMM23	0.0191
												PfIL268A06	Microsomal glutathione S-transferase 3	DV568479	MGST3	0.0199
												PfIL140G12	Hypothetical protein FLJ36748	DV565773	AFAP1L1	0.0218
												Contig693	Selenoprotein M	DV568408	SELM	0.0235
												PfIL286D01	Ras-related protein Rab-6A	DV569135	RAB6A	0.025
												PfCF2C3	Ran protein - member of Ras superfamily, nuclear GTP-ase.	AJ605272	RAN	0.0294
												PfIL205G11	Sodium/potassium ATPase alpha subunit isoform 1	DV566003	ATP1A1	0.0311
												PfIL274E11	Ubiquitin-like protein	DV568723	UBC	0.0321
												Contig853	Glutathione S-transferase theta 1	DV566513	GSTT1	0.0333
												PfBR1D10	Warm-temperature-acclimation-related-65 kDa-protein	AJ605281	HPX	0.0349
												Contig146	Phospholipase A2	DV566640	PLA2G1B	0.035
												PfIL003B10	Lectin, mannose-binding, 1	DV565350	LMAN1	0.0372
												PfIL311F09	Hypothetical protein FLJ22222	EC379479	FLJ22222	0.0393
												Contig258	Translocase of inner mitochondrial membrane 9 homolog	DV566566	TIMM13	0.0395
												PfFMO2-ll0	Inter-alpha-trypsin inhibitor heavy chain 2	AJ310420	ITIH3	0.0416
												PfIL302C11	MAP3K12 binding inhibitory protein 1	EC379322	MBIP	0.0475
												3.297	Taurine		1123	0.0496
