# Supplementary material for: Towards a System Level Understanding of Non-Model Organisms Sampled from the Environment: A Network Biology Approach
Source: PLoS Comput Biol. 2011 Aug 25;7(8):e1002126. doi: 10.1371/journal.pcbi.1002126 (PMC3161900; doi:10.1371/journal.pcbi.1002126)
Supplement: Table S3 — Gene-chemical interactions associated with sampling sites. Best viewed in MS-Excel. (XLSX) [file pcbi.1002126.s006.xlsx]

## Sheet: Sheet1
Table S3
Associations between flounder sampling sites and chemicals.
Genelists employed were those significantly differentially expressed between sites (ANOVA FDR<0.05) and at least 1.5-fold induced or repressed versus Alde fish
Gene-chemical interactions were derived from the Comparative Toxicogenomics Database (CTD)
Associations were found using EASE within TMEV, that calculated Benjamini and Hochberg multiple-testing corrected False Discovery Rates (FDR)
Final FDRs (displayed) were calculated by multiplying the FDR for a chemical acting as an inducer and the FDR for it acting as a repressor, where the compound appeared in both lists.
Brunsbuttel	FDR		Cuxhaven	FDR		Helgoland	FDR		Mersey	FDR		Morecambe Bay	FDR		Tyne	FDR
perfluorooctane sulfonic acid	0.00401618		Melatonin	0.0251619		epicatechin gallate	0.0378		Lindane	0.067946		Paraquat	0.00111655		Melatonin	0.013011
systhane	0.00641894		beta-Naphthoflavone	0.0254029		gallocatechol	0.0378		systhane	0.067946		Astemizole	0.0681262		Paraquat	0.033247
Chlorine	0.00691919		Catechin	0.0254029		Permethrin	0.0378		Fluconazole	0.0715425		sodium arsenite	0.0681262		epigallocatechin gallate	0.0402595
vinclozolin	0.00776104		Chromium	0.030964		Ethinyl Estradiol	0.0408412		Phenobarbital	0.0715425		Cycloheximide	0.0713175		Astemizole	0.0481948
Endosulfan	0.0114677		epicatechin gallate	0.03653		Astemizole	0.0438557		Dimethyl Sulfoxide	0.0736405		propiconazole	0.0713175		Catechin	0.049731
Potassium Dichromate	0.026012		gallocatechol	0.03653		Melatonin	0.04484		Flavonoids	0.0736405		Isoflavones	0.0720112		Dieldrin	0.0511469
2,4,5,2',4',5'-hexachlorobiphenyl	0.038975		Dimethyl Sulfoxide	0.0386334		Zinc	0.0456981		polyphenols	0.0749218		Corticosterone	0.0742392		epicatechin gallate	0.05637
Chromium	0.0392038		Dieldrin	0.0438247		Dexamethasone	0.0539534		Tobacco Smoke Pollution	0.0788875		Estradiol	0.0742392		Estrone	0.05637
Lindane	0.0392038		nickel sulfate	0.0477407		perfluorooctane sulfonic acid	0.0572162		Asbestos, Serpentine	0.0796991		glycidamide	0.0742392		gallocatechol	0.05637
Tetradecanoylphorbol Acetate	0.0447061		epigallocatechin gallate	0.0526828		beta-Naphthoflavone	0.0588409		perfluorooctanoic acid	0.0796991		Plant Extracts	0.0742392		Iron	0.0662374
triacsin C	0.0449768		Paraquat	0.061873		Hydrogen Peroxide	0.05939		Dust	0.0820363		systhane	0.0742392		Carbonyl Cyanide p-Trifluoromethoxyphenylhydrazone	0.0709754
Diethylnitrosamine	0.0480355		4-hydroxy-equilenin	0.0689775		Fluorouracil	0.0633579		Vitamin K 3	0.0820363		Phenobarbital	0.076077		Cyclophosphamide	0.0709754
Tosyllysine Chloromethyl Ketone	0.048151		Calcitriol	0.0689775		1-Naphthylisothiocyanate	0.0638705		Tetrachlorodibenzodioxin	0.0843419		selenomethylselenocysteine	0.0784728		polyphenols	0.0709754
Hydroxyurea	0.0488312		Ethinyl Estradiol	0.0689775		1-(5-Isoquinolinesulfonyl)-2-Methylpiperazine	0.06599		Ethinyl Estradiol	0.0867572		Deferoxamine	0.0788055		Dust	0.0728162
polyphenols	0.0493642		Potassium Dichromate	0.0689775		2,3,5-trimethyl-6-(12-hydroxy-5,10-dodecadiynyl)-1,4-benzoquinone	0.06599		Corticosterone	0.0879737		Dimethylnitrosamine	0.0788055		Plant Extracts	0.0728162
3,4,5,3',4'-pentachlorobiphenyl	0.0499888		2,3,5-trimethyl-6-(12-hydroxy-5,10-dodecadiynyl)-1,4-benzoquinone	0.06931		4-(2-aminoethyl)benzenesulfonylfluoride	0.06599		Tetrahydrocannabinol	0.0879737		Tobacco Smoke Pollution	0.0788055		systhane	0.0728162
Dimethylnitrosamine	0.050535		3,3',4,5'-tetrahydroxystilbene	0.06931		4-dichlorobenzene	0.06599		Iron	0.0906075		Benzo(a)pyrene	0.0815747		Diazinon	0.0744107
O(6)-benzylguanine	0.0522582		Anthralin	0.06931		bathocuproine sulfonate	0.06599		Antimony	0.0931745		Aflatoxin B1	0.0817992		Estradiol	0.0811889
Urethane	0.0545323		benzo(a)pyrene-7,8-dione	0.06931		Butyrates	0.06599		Antimony Potassium Tartrate	0.0931745		Endosulfan	0.0831125		Flavonoids	0.0818014
fulvestrant	0.0568061		diallyl phthalate	0.06931		calyculin A	0.06599		resveratrol	0.0940121		Ethinyl Estradiol	0.0831125		sodium arsenite	0.0818014
triadimefon	0.0592619		Diflubenzuron	0.06931		Choline	0.06599		Endosulfan	0.0970056		candoxin	0.0836075		Corticosterone	0.0861698
Polychlorinated Biphenyls	0.0611067		lansoprazole	0.06931		Cocaine	0.06599		2,4,5,2',4',5'-hexachlorobiphenyl	0.0980036		Catechin	0.0836075		Endosulfan	0.0861698
Chlorpromazine	0.0638544		Lead	0.06931		DDT	0.06599		3,4,5,3',4'-pentachlorobiphenyl	0.0980036		Lindane	0.0836075		Polychlorinated Biphenyls	0.0882298
Iodoacetates	0.0638544		LG 100815	0.06931		diallyl phthalate	0.06599					Tretinoin	0.0836075		Emodin	0.0882402
bismuth tripotassium dicitrate	0.0643797		montelukast	0.06931		dibutyldichlorotin	0.06599					Indomethacin	0.0837748		Butyrates	0.0907427
Dimethyl Sulfoxide	0.0654016		octa-2,4,6-trienoic acid	0.06931		Dieldrin	0.06599					Androstane-3,17-diol	0.0844063		manganese chloride	0.0924963
Vitamin K 3	0.0654016		rofecoxib	0.06931		Diflubenzuron	0.06599					Calcitriol	0.0844063		beta-Naphthoflavone	0.09254
Diethylhexyl Phthalate	0.0721413		Zinc	0.06931		Famotidine	0.06599					manganese chloride	0.0844063		Butylated Hydroxyanisole	0.09254
Methomyl	0.0732864		polyphenols	0.070957		lansoprazole	0.06599					polyphenols	0.0844063		Carbon Monoxide	0.09254
1-nitropropane	0.0737187		Dust	0.0736299		nickel sulfate	0.06599					Thiophenes	0.0889387		Ethinyl Estradiol	0.0925825
Hydralazine	0.0768614		Tobacco Smoke Pollution	0.0745907		Nicotine	0.06599					Diazinon	0.0906631		Indomethacin	0.092886
2,4-diaminotoluene	0.0816591		Butyrates	0.0760294		Oxygen	0.06599					Dieldrin	0.0906631		2-(4-morpholinyl)-8-phenyl-4H-1-benzopyran-4-one	0.0941192
beta-Naphthoflavone	0.0816591		Tetrachlorodibenzodioxin	0.080339		PD 169316	0.06599					Ketoconazole	0.0906631		calyculin A	0.0948954
Catechin	0.0816591		Flavonoids	0.0818946		Pilocarpine	0.06599					Vitamin E	0.0908509		O(6)-benzylguanine	0.0948954
Tobacco Smoke Pollution	0.0828844		vanadyl sulfate	0.0818946		Potassium Cyanide	0.06599					calyculin A	0.09198		Tetrachlorodibenzodioxin	0.0962068
1,2-diamino-4-nitrobenzene	0.0895488		2,4,5,2',4',5'-hexachlorobiphenyl	0.0829854		pyridine	0.06599					Dust	0.09198		Calcitriol	0.0991603
2,6-diaminotoluene	0.0895488		3,4,5,3',4'-pentachlorobiphenyl	0.0829854		Tacrine	0.06599					O(6)-benzylguanine	0.09198		Methomyl	0.0991603
2-nitro-4-phenylenediamine	0.0895488		Estrogens, Catechol	0.0829854		Vitamin K 3	0.06599					Terfenadine	0.09198		Metribolone	0.0991603
4-acetylaminofluorene	0.0895488		O(6)-benzylguanine	0.0829854		Lindane	0.0692385					Thiourea	0.09198		Tobacco Smoke Pollution	0.0991603
2-nitropropane	0.0915039		Plant Extracts	0.0829854		polyphenols	0.0696655					4-(N-methyl-N-nitrosamino)-1-(3-pyridyl)-1-butanone	0.0944635
Dieldrin	0.0957427		Polychlorinated Biphenyls	0.0829854		Tobacco Smoke Pollution	0.0696655					Melatonin	0.0944635
Emodin	0.0957427		alpha-naphthoflavone	0.0862457		Carbonyl Cyanide p-Trifluoromethoxyphenylhydrazone	0.070081					Methoxychlor	0.0944635
quinoline	0.0957427		Diazinon	0.0862457		ebastine	0.0714941					Mustard Gas	0.0944635
Flavonoids	0.0968204		Toluene 2,4-Diisocyanate	0.0862457		Fluconazole	0.0714941					nickel chloride	0.0944635
Ethinyl Estradiol	0.0989571		Arachidonic Acid	0.0914136		Polychlorinated Biphenyls	0.0714941					phenethyl isothiocyanate	0.0944635
			irinotecan	0.0935862		propiconazole	0.0714941					Emodin	0.0958334
			2,3-dimethoxy-1,4-naphthoquinone	0.0939523		systhane	0.0714941					Butyrates	0.0962694
			Chlorine	0.0949705		Tosyllysine Chloromethyl Ketone	0.0714941					bicalutamide	0.0976157
			Iron	0.0949705		bisphenol A	0.0730661					Iron	0.0976157
			Lipopolysaccharides	0.097035		Calcitriol	0.0730661					tobacco tar	0.0976157
			tobacco tar	0.097035		Flavonoids	0.0765905					1,2-dithiol-3-thione	0.0976375
			Carbonyl Cyanide p-Trifluoromethoxyphenylhydrazone	0.0973845		Tetrachlorodibenzodioxin	0.0765905					Streptozocin	0.0988885
			fulvestrant	0.0985256		vanadyl sulfate	0.0799558					Valproic Acid	0.0992062
			Vitamin E	0.098737		Paraquat	0.07996					CD 437	0.0997221
						Genistein	0.0818515					Nicotine	0.0997221
						Lipopolysaccharides	0.0825021
						alpha-naphthoflavone	0.0846036
						Tretinoin	0.0846036
						Dust	0.0903713
						O(6)-benzylguanine	0.090479
						Phenobarbital	0.090479
						Thiourea	0.090479
						Estrogens	0.09183
						Methyl Parathion	0.09183
						Carbon Tetrachloride	0.0924685
						Arachidonic Acid	0.0946647
						perfluorooctanoic acid	0.0946647
						Zymosan	0.0946647
						Chlorpyrifos	0.09654
						perchlorate	0.09654
						bismuth tripotassium dicitrate	0.0973303
						Manganese	0.0973303
						irinotecan	0.0980412
						triadimefon	0.0989651
						gemcitabine	0.0994704
