# Supplementary material for: Towards a System Level Understanding of Non-Model Organisms Sampled from the Environment: A Network Biology Approach
Source: PLoS Comput Biol. 2011 Aug 25;7(8):e1002126. doi: 10.1371/journal.pcbi.1002126 (PMC3161900; doi:10.1371/journal.pcbi.1002126)
Supplement: Table S4 — Omic data altered with Lepeophtheirus infection. Genes and metabolites altered with Lepeophtheirus infection in Morecambe Bay fish (T-test FDR<0.05). Best viewed in MS-Excel. (XLSX) [file pcbi.1002126.s007.xlsx]

## Sheet: sig up Lep MB
Table S4
Genes and metabolites altered with Lepeoptheirus infection in Morecambe Bay flounders with FDR<0.05
Data shown are fold changes for infected versus non-infected fish.
Genbank identifiers are representative for one EST per contig, Symbol shows putative human orthologs
Data are highlighted red where fold change versus uninfected was >1.5 and blue where fold change versus uninfected was <0.666
Names are shown in red text where these genes were also differentially expressed (ANOVA FDR<0.05) between sites
In total, 15 metabolite bins and 60 transcripts were altered at FDR<0.05, only identified genes and metabolites are shown
ID	Common Name	Genbank	Symbol	Fold Change
PfIL252H11	Mx (Mx) gene	DV567801	MX1	4.268
PfIL298F10	Mitogen-activated protein kinase 12	DV569613	MAPK12	4.145
PfIL214H11	Synaptotagmin binding, cytoplasmic RNA interacting protein	DV566311	SYNCRIP	4.142
PfIL284H05	Transferrin	EC379046	TF	3.693
PfIL006B11	Bifunctional methylenetetrahydrofolate dehydrogenase/cyclohydrolase, mitochondrial	EC377577	MTHFD2	3.322
Contig358	12S small subunit ribosomal RNA	DV567081	na	3.183
PfIL287B05	Mitogen-activated protein-binding protein-interacting protein MAPBPIP	DV569164	MAPBPIP	3.094
PfIL306F07	Signal transducer/activator of transcription Stat1	DV569947	STAT1	3.074
PfIL288G04	Ubiquitin carboxyl-terminal hydrolase 21 (Ubiquitin thiolesterase 21)	EC379101	USP21	3.056
PfIL245B10	Collagen, type IV, alpha 2	DV567448	COL4A2	2.881
Contig852	Complement control protein factor I-B	DV569070	CFI	2.842
PfIL001B06	18S ribosomal RNA	DV565299	RNR1	2.661
PfIL299E06	Toll-like receptor5	EC379274	TLR5	2.627
PfIL216H09	Clathrin, heavy polypeptide (Hc)	DV566358	CLTC	2.382
PfIL229A07	Salvador homolog 1	DV566768	SAV1	2.297
PfIL212F11	AP (apurinic or apyrimidinic) endonuclease apn1	DV566238	APN1	2.183
PfIL301E05	PDGFA associated protein 1	DV569725	PDAP1	1.918
PfIL267H12	Selenium binding protein 1	DV568476	SELENBP1	1.884
PfIL309A10	Hs C6orf157	EC379433	UBE2CBP	1.877
PfIL273D09	Cyclin-dependent kinase inhibitor 3	DV568674	CDKN3	1.732
2.932	N,N-dimethylglycine		673	1.73
PfIL020H10	STEAP family member 4	EC377685	STEAP4	0.449
PfIL289G06	Translocase of outer mitochondrial membrane 40 homolog	DV569273	TOMM40	0.414
PfIL210E01	Hydroxyacid oxidase 1, liver; glycolate oxidase 1	DV566184	HAO1	0.41
Pa005	Glucose transporter type 2	na	SLC2A2	0.409
PfIL205C04	Serine incorporator 1	DV565980	SERINC1	0.399
Pa010	Carboxypeptidase B	ay225096	CPB2	0.371
PfIL272C08	Autophagy protein 12-like (APG12-like)	DV569044	ATG12	0.361
Contig342	TNF alpha-induced adipose-related protein	DV567452	STEAP4	0.359
PfIL262G01	Trans-golgi network protein 2	EC378693	TGOLN2	0.348
PfPARA-o2	Paraoxonase 2	aj292086	PON2	0.347
PfIL008G02	Prefoldin subunit 4	EC377610	PFDN4	0.329
PfIL247G01	Aspartyl-tRNA synthetase	EC378473	DARS	0.307
PfIL020E01	Cytochrome P450 2K5	DV565685	CYP2J2	0.265
